# Supplementary material for: Direct N-acylation of azoles via a metal-free catalyzed oxidative cross-coupling strategy
Source: Royal Society of Chemistry journal article supplement (doi:10.1039/c4cc01587h), 2014-01-01
Supplement: c4cc01587h1.pdf [file c4cc01587h1.pdf]

## **Electronic Supplementary Information**

### **Direct *N*-acylation of azoles via metal-free catalyzed oxidative cross-coupling strategy**

**Jingjing Zhao,<sup>ab</sup> Pan Li,<sup>a</sup> Chungu Xia<sup>a</sup> and Fuwei Li<sup>\*a</sup>**

<sup>†</sup> State Key Laboratory for Oxo Synthesis and Selective Oxidation, Lanzhou Institute of Chemical Physics, Chinese Academy of Sciences, Lanzhou 730000, P. R. China

<sup>‡</sup> Graduate University of Chinese Academy of Sciences, Beijing 100049, P. R. China.

*Email: [fuweili@licp.cas.cn](mailto:fuweili@licp.cas.cn)*

#### **Electronic Supplementary Information Contents:**

|                                                               |             |
|---------------------------------------------------------------|-------------|
| General Information.....                                      | ESI2        |
| General Procedure for <i>N</i> -Acylation of Azoles.....      | ESI2        |
| General Procedure for Radical Trapping Experiments.....       | ESI3        |
| General Procedure for Control Experiments.....                | ESI4-ESI6   |
| Characterization of the Products.....                         | ESI8-ESI15  |
| References and Notes.....                                     | SES16       |
| Copies of <sup>1</sup> H and <sup>13</sup> C NMR Spectra..... | ESI17-ESI44 |

## General Information:

All reagents purchased from commercial sources were used as received. The silica gel for column chromatography was supplied as 300–400 meshes. The  $^1\text{H}$  and  $^{13}\text{C}$  NMR spectra were recorded on a Bruker AVANCE III spectrometer and are referenced to the residual solvent signals (7.26 ppm for  $^1\text{H}$  and 77.0 ppm for  $^{13}\text{C}$  in  $\text{CDCl}_3$ ). The HRMS spectra were recorded on a Bruker micrOTOF Q II spectrometer.

## General Procedure for *N*-Acylation of Azoles (3, 5):

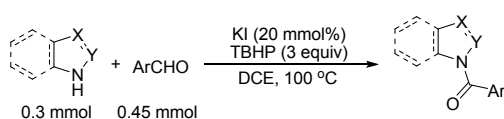

To a 15 mL pressure tube with a stir bar was added 0.3 mmol of azole **1**, **4**, 0.45 mmol of aldehyde **2** or benzil (1.5 equiv), followed by 0.06 mmol of KI (0.2 equiv). Then 3 mL of DCE was added, followed by 0.9 mmol of TBHP (70% aqueous). The reaction mixture was stirred at 100 °C for 12 h, cooled to room temperature, poured into brine and extracted with EtOAc. The combined extracts were dried over  $\text{MgSO}_4$ , filtered, and evaporated. The residue was purified by column chromatography (petroleum ether/EtOAc) to afford the desired product **3**, **5**.

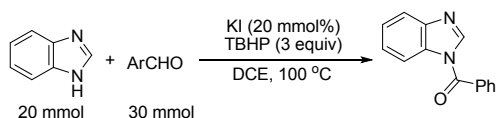

To a 100 mL round-bottom flask with a stir bar was added 20 mmol of benzoimidazole, 30 mmol of benzaldehyde (1.5 equiv), followed by 4 mmol of KI (0.2 equiv). Then 25 mL of DCE was added, followed by 60 mmol of TBHP (70% aqueous). The flask with a condenser was open in air. The reaction mixture was stirred at 100 °C for 12 h, cooled to room temperature, poured into brine and extracted with EtOAc. The combined extracts were dried over  $\text{MgSO}_4$ , filtered, and evaporated. The residue was purified by column chromatography (petroleum ether/EtOAc) to afford the desired product **5a** (3.78 g, 85% yield).

## General Procedure for Radical Trapping Experiments:

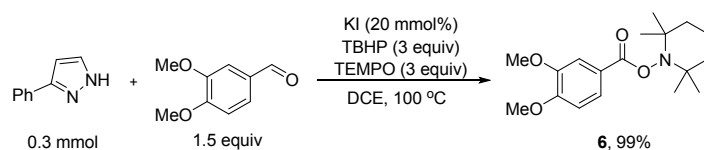

To a 15 mL pressure tube with a stir bar was added 0.3 mmol of 5-phenyl-1H-pyrazole **1a**, 0.45 mmol of 3,4-dimethoxybenzaldehyde **2a** (1.5 equiv), followed by 0.06 mmol of KI (0.2 equiv). Then 3 mL of DCE was added, followed by 0.9 mmol of TBHP (70% aqueous) and 0.9 mmol of TEMPO (2,2,6,6-Tetramethylpiperidinoxy). The reaction mixture was stirred at 100 °C for 12 h, cooled to room temperature, poured into brine and extracted with EtOAc. The combined extracts were dried over MgSO<sub>4</sub>, filtered, and evaporated. The residue was purified by column chromatography (petroleum ether/EtOAc) to afford **6** in 99% yield.

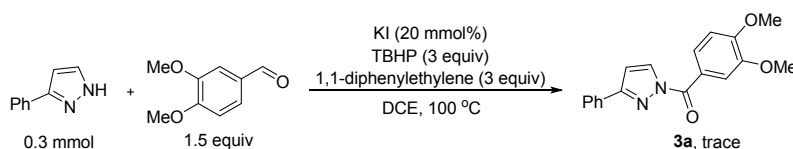

To a 15 mL pressure tube with a stir bar was added 0.3 mmol of 5-phenyl-1H-pyrazole **1a**, 0.45 mmol of 3,4-dimethoxybenzaldehyde **2a** (1.5 equiv), followed by 0.06 mmol of KI (0.2 equiv). Then 3 mL of DCE was added, followed by 0.9 mmol of TBHP (70% aqueous) and 0.9 mmol of 1,1-Diphenylethylene. The reaction mixture was stirred at 100 °C for 12 h, cooled to room temperature. Only trace **3a** was detected by GC-MS.

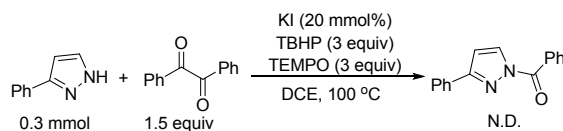

To a 15 mL pressure tube with a stir bar was added 0.3 mmol of 5-phenyl-1H-pyrazole **1a**, 0.45 mmol of benzil (1.5 equiv), followed by 0.06 mmol of KI (0.2 equiv). Then 3 mL of DCE was added, followed by 0.9 mmol of TBHP (70% aqueous) and 0.9 mmol of TEMPO. The reaction mixture was stirred at 100 °C for 12 h, cooled to room temperature. The desired product was not detected by GC-MS.

## General Procedure for Control Experiments:

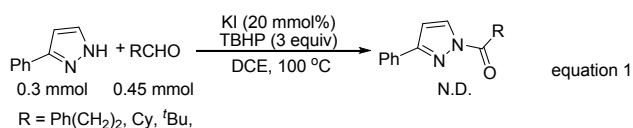

To a 15 mL pressure tube with a stir bar was added 0.3 mmol of pyrazole **1a**, 0.45 mmol of aliphatic aldehyde (1.5 equiv), followed by 0.06 mmol of KI (0.2 equiv). Then 3 mL of DCE was added, followed by 0.9 mmol of TBHP (70% aqueous). The reaction mixture was stirred at 100 °C for 12 h, cooled to room temperature. The desired product was not detected by GC-MS. The pyrazole **1a** and corresponding aliphatic aldehyde were recovered, unusual product was not detected by GC-MS.

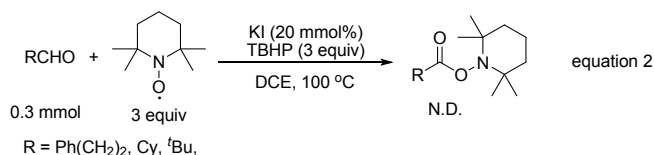

To a 15 mL pressure tube with a stir bar was added 0.3 mmol of 3-phenylpropanal, 0.9 mmol of TEMPO, followed by 0.06 mmol of KI (0.2 equiv). Then 3 mL of DCE was added, followed by 0.9 mmol of TBHP (70% aqueous). The reaction mixture was stirred at 100 °C for 12 h, cooled to room temperature. The corresponding aliphatic aldehyde was recovered, and the coupling product of 3-phenylpropanal and TEMPO was not detected by GC-MS.

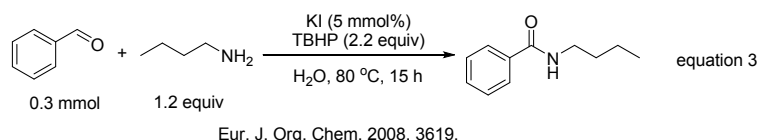

To a 15 mL pressure tube with a stir bar was added 0.3 mmol of benzaldehyde, 0.36 mmol of butan-1-amine (1.2 equiv), followed by 0.015 mmol of KI (0.05 equiv). Then 3 mL of H<sub>2</sub>O was added, followed by 0.66 mmol of TBHP (70% aqueous). The reaction mixture was stirred at 80 °C for 15 h, cooled to room temperature. The amide was detected as the major product by GC-MS.

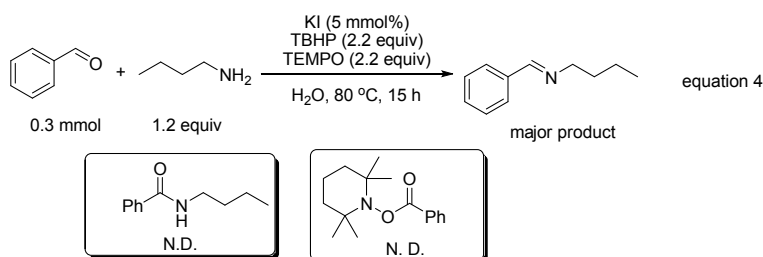

To a 15 mL pressure tube with a stir bar was added 0.3 mmol of benzaldehyde, 0.36 mmol of butan-1-amine (1.2 equiv), followed by 0.015 mmol of KI (0.05 equiv) and 0.66 mmol of TEMPO (2.2 equiv). Then 3 mL of H<sub>2</sub>O was added, followed by 0.66 mmol of TBHP (70% aqueous). The reaction mixture was stirred at 80 °C for 15 h, cooled to room temperature. The amide and the coupling product of acyl radical and TEMPO were not detected by GC-MS. Instead, the imine product was observed as the major product by GC-MS.

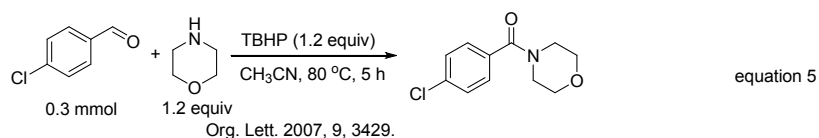

To a 15 mL pressure tube with a stir bar was added 0.3 mmol of 4-chlorobenzaldehyde, 0.36 mmol of morpholine (1.2 equiv). Then 3 mL of CH<sub>3</sub>CN was added, followed by 0.36 mmol of TBHP (70% aqueous). The reaction mixture was stirred at 80 °C for 5 h, cooled to room temperature. The amide was detected as the major product by GC-MS.

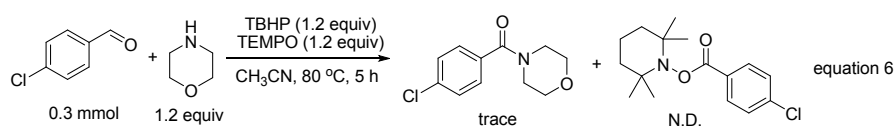

To a 15 mL pressure tube with a stir bar was added 0.3 mmol of 4-chlorobenzaldehyde, 0.36 mmol of morpholine (1.2 equiv), followed by 0.66 mmol of TEMPO (2.2 equiv). Then 3 mL of CH<sub>3</sub>CN was added, followed by 0.36 mmol of TBHP (70% aqueous). The reaction mixture was stirred at 80 °C for 5 h, cooled to room temperature. Only trace amide was detected by GC-MS. And the coupling product of acyl radical and TEMPO were not detected by GC-MS.

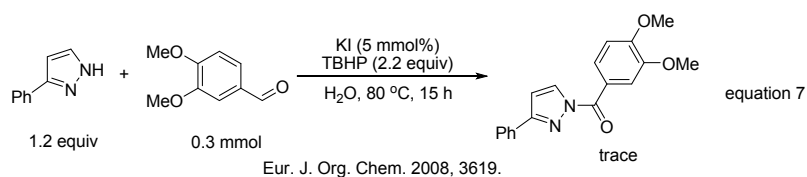

To a 15 mL pressure tube with a stir bar was added 0.3 mmol of 3,4-dimethoxybenzaldehyde **2a**, 0.36 mmol of 3-phenyl-1H-pyrazole **1a** (1.2 equiv), followed by 0.015 mmol of KI (0.05 equiv). Then 3 mL of H<sub>2</sub>O was added, followed by 0.66 mmol of TBHP (70% aqueous). The reaction mixture was stirred at 80 °C for 15 h, cooled to room temperature. Only trace **3a** was detected by GC-MS.

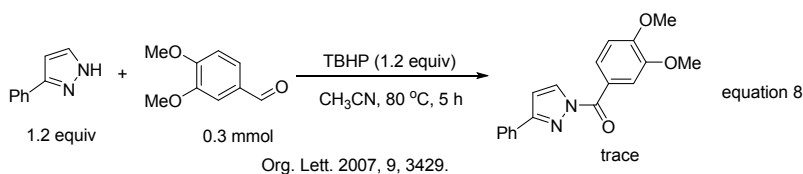

To a 15 mL pressure tube with a stir bar was added 0.3 mmol of 3,4-dimethoxybenzaldehyde **2a**, 0.36 mmol of 3-phenyl-1H-pyrazole **1a** (1.2 equiv). Then 3 mL of CH<sub>3</sub>CN was added, followed by 0.36 mmol of TBHP (70% aqueous). The reaction mixture was stirred at 80 °C for 5 h, cooled to room temperature. Only trace **3a** was detected by GC-MS.

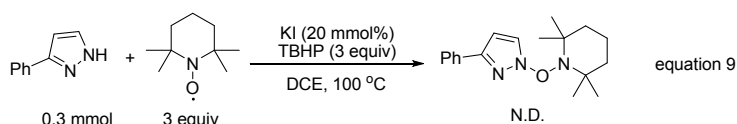

To a 15 mL pressure tube with a stir bar was added 0.3 mmol of 5-phenyl-1H-pyrazole **1a**, 0.9 mmol of TEMPO, followed by 0.06 mmol of KI (0.2 equiv). Then 3 mL of DCE was added, followed by 0.9 mmol of TBHP (70% aqueous). The reaction mixture was stirred at 100 °C for 12 h, cooled to room temperature. The coupling product of **1a** and TEMPO was not detected by GC-MS.

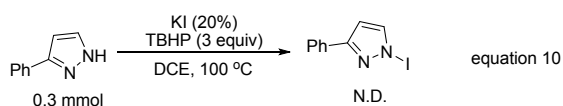

To a 15 mL pressure tube with a stir bar was added 0.3 mmol of 5-phenyl-1H-pyrazole **1a**, followed by 0.06 mmol of KI (0.2 equiv). Then 3 mL of DCE was added, followed by 0.9 mmol of TBHP (70% aqueous). The reaction mixture was stirred at 100 °C for 12 h, cooled to room temperature. The 1-iodo-3-phenyl-1H-pyrazole was not detected by GC-MS.

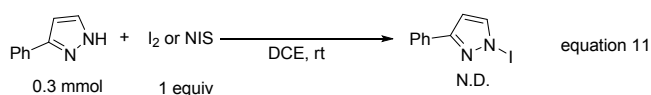

To a 15 mL pressure tube with a stir bar was added 0.3 mmol of 5-phenyl-1H-pyrazole **1a**, followed by 0.3 mmol of I<sub>2</sub> or NIS (1 equiv). Then 3 mL of DCE was added. The reaction mixture was stirred at room temperature for 12 h. The 1-iodo-3-phenyl-1H-pyrazole was not detected by GC-MS.

### Characterization Data of Compounds 3a-3p:

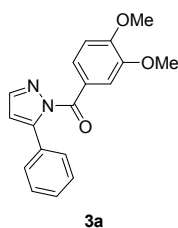

**(3,4-dimethoxyphenyl)(5-phenyl-1H-pyrazol-1-yl)methanone (3a) [New compound].** <sup>1</sup>H NMR (400 MHz, CDCl<sub>3</sub>) δ 8.48 (d, *J* = 2.9 Hz, 1 H), 8.14 (dd, *J* = 8.5, 2.1 Hz, 1 H), 7.96 (d, *J* = 2.0 Hz, 1 H), 7.93–7.87 (m, 2 H), 7.50–7.36 (m, 3 H), 6.99 (t, *J* = 8.2 Hz, 1 H), 6.85 (d, *J* = 2.9 Hz, 1 H), 4.00 (s, 3 H), 3.98 (s, 3 H); <sup>13</sup>C NMR (100 MHz, CDCl<sub>3</sub>) δ 164.9, 155.6, 153.4, 148.3, 132.0, 132.0, 129.1, 128.8, 127.2, 126.3, 123.5, 114.7, 110.1, 106.7, 56.1, 56.0; HRMS (ESI) Calcd for C<sub>18</sub>H<sub>16</sub>N<sub>2</sub>NaO<sub>3</sub> [M+Na] 331.1066, Found 331.1053.

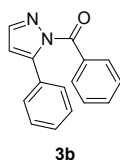

**phenyl(5-phenyl-1H-pyrazol-1-yl)methanone (3b) [New compound].** <sup>1</sup>H NMR (400 MHz, CDCl<sub>3</sub>) δ 8.48 (d, *J* = 2.9 Hz, 1 H), 8.31–8.25 (m, 2 H), 7.93–7.87 (m, 2 H), 7.68–7.62 (m, 1 H), 7.58–7.51 (m, 2 H), 7.47–7.37 (m, 3 H), 6.87 (d, *J* = 2.9 Hz, 1 H); <sup>13</sup>C NMR (100 MHz, CDCl<sub>3</sub>) δ 166.1, 155.9, 133.0, 131.9, 131.8, 131.7, 131.5, 129.2, 128.7, 128.0, 126.4, 107.2; HRMS (ESI) Calcd for C<sub>16</sub>H<sub>12</sub>N<sub>2</sub>NaO [M+Na] 271.0844, Found 271.0842.

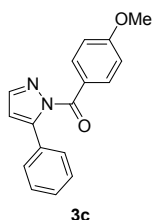

**(4-methoxyphenyl)(5-phenyl-1H-pyrazol-1-yl)methanone (3c) [New compound].** <sup>1</sup>H NMR (400 MHz, CDCl<sub>3</sub>) δ 8.47 (t, *J* = 3.6 Hz, 1 H), 8.42–8.35 (m, 2 H), 7.92–7.89 (m, 2 H), 7.50–7.37 (m, 3 H), 7.05–6.99 (m, 2 H), 6.84 (d, *J* = 2.9 Hz, 1 H), 3.91 (s, 3 H); <sup>13</sup>C NMR (100 MHz, CDCl<sub>3</sub>) δ 165.1, 163.6, 155.5, 134.5, 132.0, 131.8, 129.0, 128.7, 126.3, 123.5, 113.4, 106.7, 55.5; HRMS (ESI) Calcd for C<sub>17</sub>H<sub>14</sub>N<sub>2</sub>NaO<sub>2</sub> [M+Na] 301.0962, Found 301.0947.

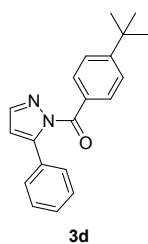

**(4-(*tert*-butyl)phenyl)(5-phenyl-1*H*-pyrazol-1-yl)methanone (3d) [New compound].** <sup>1</sup>H NMR (400 MHz, CDCl<sub>3</sub>) δ 8.48 (d, *J* = 2.9 Hz, 1 H), 8.31 – 8.22 (m, 2 H), 7.96 – 7.88 (m, 2 H), 7.61 – 7.54 (m, 2 H), 7.50 – 7.37 (m, 3 H), 6.86 (d, *J* = 2.9 Hz, 1 H), 1.40 (s, 9 H); <sup>13</sup>C NMR (100 MHz, CDCl<sub>3</sub>) δ 165.8, 156.8, 155.7, 132.0, 131.9, 131.7, 129.1, 128.7, 128.5, 126.4, 125.1, 106.9, 35.1, 31.1; HRMS (ESI) Calcd for C<sub>20</sub>H<sub>20</sub>N<sub>2</sub>NaO [M+Na] 327.1460, Found 327.1468.

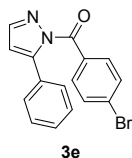

**(4-bromophenyl)(5-phenyl-1*H*-pyrazol-1-yl)methanone (3e) [New compound].** <sup>1</sup>H NMR (400 MHz, CDCl<sub>3</sub>) δ 8.18 (s, 1 H), 8.18–8.13 (m, 1 H), 7.85–7.83 (m, 1 H), 7.78–7.72 (m, 2 H), 7.68 (dd, *J* = 8.6, 1.9 Hz, 2 H), 7.51–7.39 (m, 2 H); <sup>13</sup>C NMR (100 MHz, CDCl<sub>3</sub>) δ 166.1, 144.1, 142.6, 132.4, 132.0, 131.6, 131.0, 128.4, 125.9, 125.4, 120.7, 115.4; HRMS (ESI) Calcd for C<sub>14</sub>H<sub>9</sub>BrN<sub>2</sub>NaO [M+Na] 322.9782, Found 322.9790.

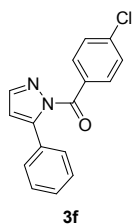

**(4-chlorophenyl)(5-phenyl-1*H*-pyrazol-1-yl)methanone (3f) [New compound].** <sup>1</sup>H NMR (400 MHz, CDCl<sub>3</sub>) δ 8.48 (d, *J* = 2.9 Hz, 1 H), 8.31–8.23 (m, 2 H), 7.93–7.84 (m, 2 H), 7.54–7.50 (m, 2 H), 7.48–7.38 (m, 3 H), 6.88 (d, *J* = 2.9 Hz, 1 H); <sup>13</sup>C NMR (100 MHz, CDCl<sub>3</sub>) δ 165.0, 156.1, 139.6, 133.4, 131.7, 131.6, 129.8, 129.3, 128.8, 128.4, 126.4, 107.4; HRMS (ESI) Calcd for C<sub>16</sub>H<sub>11</sub>ClN<sub>2</sub>NaO [M+Na] 305.0448, Found 305.0452.



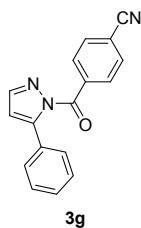

**4-(5-phenyl-1*H*-pyrazole-1-carbonyl)benzonitrile (3g) [New compound].** <sup>1</sup>H NMR (400 MHz, CDCl<sub>3</sub>) δ 8.48 (d, *J* = 2.9 Hz, 1 H), 8.34 (d, *J* = 8.2 Hz, 2 H), 7.90–7.79 (m, 4 H), 7.48–7.40 (m, 3 H), 6.91 (d, *J* = 2.9 Hz, 1 H); <sup>13</sup>C NMR (100 MHz, CDCl<sub>3</sub>) δ 164.5, 156.6, 135.4, 132.1, 131.7, 131.6, 131.2, 129.5, 128.8, 126.4, 117.9, 116.1, 108.0; HRMS (ESI) Calcd for C<sub>17</sub>H<sub>11</sub>N<sub>3</sub>NaO [M+Na] 296.0794, Found 296.0794.

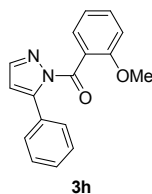

**(2-methoxyphenyl)(5-phenyl-1*H*-pyrazol-1-yl)methanone (3h) [New compound].** <sup>1</sup>H NMR (400 MHz, CDCl<sub>3</sub>) δ 8.29 (d, *J* = 2.9 Hz, 1 H), 7.86–7.78 (m, 2 H), 7.59–7.50 (m, 2 H), 7.42–7.35 (m, 3 H), 7.09–7.03 (m, 2 H), 6.81 (d, *J* = 2.9 Hz, 1 H), 3.82 (s, 3 H); <sup>13</sup>C NMR (100 MHz, CDCl<sub>3</sub>) δ 196.5, 157.9, 155.7, 132.7, 131.9, 131.1, 130.5, 129.1, 128.6, 126.4, 122.7, 120.2, 111.6, 107.3, 55.9; HRMS (ESI) Calcd for C<sub>17</sub>H<sub>14</sub>N<sub>2</sub>NaO<sub>2</sub> [M+Na] 301.0954, Found 301.0947.

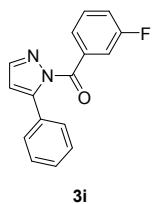

**(3-fluorophenyl)(5-phenyl-1*H*-pyrazol-1-yl)methanone (3i) [New compound].** <sup>1</sup>H NMR (400 MHz, CDCl<sub>3</sub>) δ 8.48 (d, *J* = 2.9 Hz, 1 H), 8.11–8.07 (m, 1 H), 8.07–8.02 (m, 1 H), 7.92–7.86 (m, 2 H), 7.51 (td, *J* = 8.0, 5.6 Hz, 1 H), 7.48–7.38 (m, 3 H), 7.35 (tdd, *J* = 8.3, 2.6, 0.9 Hz, 1 H), 6.89 (d, *J* = 2.9 Hz, 1 H); <sup>13</sup>C NMR (100 MHz, CDCl<sub>3</sub>) δ 164.7, 162.1 (<sup>1</sup>*J*<sub>CF</sub> = 246.8 Hz), 156.3, 133.4 (<sup>3</sup>*J*<sub>CF</sub> = 7.8 Hz), 131.8, 131.6, 129.7 (<sup>3</sup>*J*<sub>CF</sub> = 7.8 Hz), 129.4, 128.8, 127.7 (<sup>4</sup>*J*<sub>CF</sub> = 3.2 Hz), 126.4, 120.1

( $^2J_{CF} = 21.3$  Hz), 119.0 ( $^1J_{CF} = 24.1$  Hz), 107.6; HRMS (ESI) Calcd for  $C_{16}H_{11}FN_2NaO$  [M+Na] 289.0740, Found 289.0748.

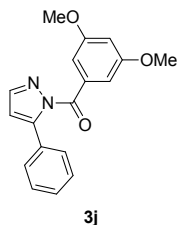

**(3,5-dimethoxyphenyl)(5-phenyl-1H-pyrazol-1-yl)methanone (3j)**

**[Newcompound].**  $^1H$  NMR (400 MHz,  $CDCl_3$ )  $\delta$  8.46 (d,  $J = 2.9$  Hz, 1 H), 7.93–7.85 (m, 2 H), 7.46–7.39 (m, 5 H), 6.87 (d,  $J = 2.9$  Hz, 1 H), 6.73 (t,  $J = 2.3$  Hz, 1 H), 3.87 (s, 6 H);  $^{13}C$  NMR (100 MHz,  $CDCl_3$ )  $\delta$  165.7, 160.2, 155.9, 133.0, 132.0, 131.8, 129.2, 128.8, 126.3, 109.6, 107.2, 105.9, 55.6; HRMS (ESI) Calcd for  $C_{18}H_{16}N_2NaO_3$  [M+Na] 331.1054, Found 331.1053.

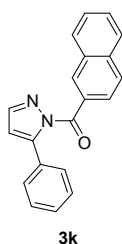

**naphthalen-2-yl(5-phenyl-1H-pyrazol-1-yl)methanone (3k) [New compound].**

$^1H$  NMR (400 MHz,  $CDCl_3$ )  $\delta$  8.93 (s, 1 H), 8.54 (d,  $J = 2.9$  Hz, 1 H), 8.31–8.24 (m, 1 H), 8.03 (d,  $J = 8.1$  Hz, 1 H), 7.97 (d,  $J = 8.7$  Hz, 1 H), 7.94–7.91 (m, 3 H), 7.67–7.63 (m, 1 H), 7.61–7.57 (m, 1 H), 7.50–7.37 (m, 3 H), 6.90 (d,  $J = 2.9$  Hz, 1 H);  $^{13}C$  NMR (100 MHz,  $CDCl_3$ )  $\delta$  166.1, 155.9, 135.4, 134.1, 132.2, 131.8, 129.7, 129.2, 128.8, 128.6, 127.7, 127.6, 127.1, 126.7, 126.4, 107.1; HRMS (ESI) Calcd for  $C_{20}H_{14}N_2NaO$  [M+Na] 321.1000, Found 321.0998.

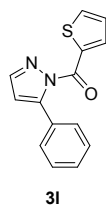

**(5-phenyl-1H-pyrazol-1-yl)(thiophen-2-yl)methanone (3l) [New compound].**

$^1H$  NMR (400 MHz,  $CDCl_3$ )  $\delta$  8.48 (dd,  $J = 3.9, 1.3$  Hz, 1 H), 8.46 (d,  $J = 2.9$  Hz, 1 H), 7.98 (dd,  $J = 5.3,$

3.3 Hz, 2 H), 7.84 (dd,  $J = 5.0, 1.3$  Hz, 1 H), 7.53–7.46 (m, 2 H), 7.43 (ddd,  $J = 7.4, 3.7, 1.3$  Hz, 1 H), 7.22 (dd,  $J = 4.9, 4.0$  Hz, 1 H), 6.86 (d,  $J = 2.9$  Hz, 1 H);  $^{13}\text{C}$  NMR (100 MHz,  $\text{CDCl}_3$ )  $\delta$  158.6, 155.5, 138.5, 137.7, 132.2, 131.7, 130.8, 129.2, 128.8, 127.2, 126.4, 107.3; HRMS (ESI) Calcd for  $\text{C}_{14}\text{H}_{10}\text{N}_2\text{NaOS}$  [ $\text{M}+\text{Na}$ ] 277.0398, Found 277.0406.

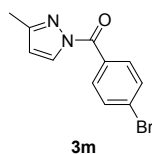

**(4-bromophenyl)(3-methyl-1H-pyrazol-1-yl)methanone (3m) [New compound].**

$^1\text{H}$  NMR (400 MHz,  $\text{CDCl}_3$ )  $\delta$  8.31 (d,  $J = 2.7$  Hz, 1 H), 8.08–7.99 (m, 2 H), 7.67–7.61 (m, 2 H), 6.34 (d,  $J = 2.8$  Hz, 1 H), 2.35 (s, 3 H);  $^{13}\text{C}$  NMR (100 MHz,  $\text{CDCl}_3$ )  $\delta$  165.1, 154.7, 133.1, 131.4, 131.1, 130.5, 128.1, 110.5, 14.0; HRMS (ESI) Calcd for  $\text{C}_{11}\text{H}_9\text{BrN}_2\text{NaO}$  [ $\text{M}+\text{Na}$ ] 286.9786, Found 286.9790.

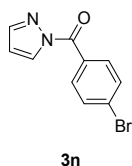

**(4-bromophenyl)(1H-pyrazol-1-yl)methanone (3n) [New compound].**

$^1\text{H}$  NMR (400 MHz,  $\text{CDCl}_3$ )  $\delta$  8.43 (dd,  $J = 2.9, 0.5$  Hz, 1 H), 8.08–7.99 (m, 2 H), 7.80 (d,  $J = 0.7$  Hz, 1 H), 7.71–7.62 (m, 2 H), 6.53 (dd,  $J = 2.8, 1.5$  Hz, 1 H);  $^{13}\text{C}$  NMR (100 MHz,  $\text{CDCl}_3$ )  $\delta$  165.4, 144.7, 133.1, 131.4, 130.4, 130.2, 128.3, 109.7; HRMS (ESI) Calcd for  $\text{C}_{10}\text{H}_7\text{BrN}_2\text{NaO}$  [ $\text{M}+\text{Na}$ ] 272.9639, Found 272.9634.

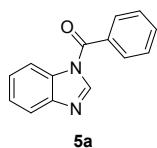

**(1H-benzo[d]imidazol-1-yl)(phenyl)methanone (5a)<sup>1</sup>.**

$^1\text{H}$  NMR (400 MHz,  $\text{CDCl}_3$ )  $\delta$  8.22 (s, 1 H), 8.22–8.19 (m, 1 H), 7.87–7.83 (m, 1 H), 7.81 (dd,  $J = 5.2, 3.3$  Hz, 2 H), 7.74–7.67 (m, 1 H), 7.62–7.58 (m, 2 H), 7.49–7.41 (m, 2 H);  $^{13}\text{C}$  NMR (100 MHz,  $\text{CDCl}_3$ )  $\delta$  167.1, 144.1, 143.1, 133.2, 132.9, 132.1, 129.5, 129.1, 125.8, 125.3, 120.6, 115.5; HRMS (ESI) Calcd for  $\text{C}_{14}\text{H}_{11}\text{N}_2\text{O}$  [ $\text{M}+\text{H}$ ] 223.0866, Found 223.0866.

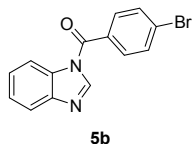

**(1*H*-benzo[*d*]imidazol-1-yl)(4-bromophenyl)methanone (5b) [New compound].** <sup>1</sup>H NMR (400 MHz, CDCl<sub>3</sub>) δ 8.18 (s, 1 H), 8.18–8.13 (m, 1 H), 7.85–7.83 (m, 1 H), 7.78–7.72 (m, 2 H), 7.68 (dd, *J* = 8.6, 1.9 Hz, 2 H), 7.51–7.39 (m, 2 H); <sup>13</sup>C NMR (100 MHz, CDCl<sub>3</sub>) δ 166.1, 144.1, 142.6, 132.4, 132.0, 131.6, 131.0, 128.4, 125.9, 125.4, 120.7, 115.4; HRMS (ESI) Calcd for C<sub>14</sub>H<sub>9</sub>BrN<sub>2</sub>NaO [M+Na] 322.9782, Found 322.9790.

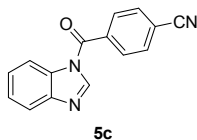

**4-(1*H*-benzo[*d*]imidazole-1-carbonyl)benzonitrile (5c) [New compound].** <sup>1</sup>H NMR (400 MHz, CDCl<sub>3</sub>) δ 8.21–8.14 (m, 1 H), 8.12 (s, 1 H), 7.97–7.88 (m, 4 H), 7.87–7.82 (m, 1 H), 7.51–7.43 (m, 2 H); <sup>13</sup>C NMR (100 MHz, CDCl<sub>3</sub>) δ 165.3, 144.1, 142.3, 136.7, 132.9, 131.8, 129.9, 126.3, 125.9, 120.9, 117.4, 116.8, 115.5; HRMS (ESI) Calcd for C<sub>15</sub>H<sub>9</sub>N<sub>3</sub>NaO [M+Na] 270.0630, Found 270.0638.

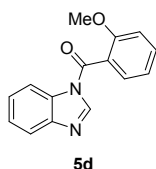

**(1*H*-benzo[*d*]imidazol-1-yl)(2-methoxyphenyl)methanone (5d) [New compound].** <sup>1</sup>H NMR (400 MHz, CDCl<sub>3</sub>) δ 8.30–8.21 (m, 1 H), 7.97 (s, 1 H), 7.86–7.73 (m, 1 H), 7.59 (m, 1 H), 7.54 (dd, *J* = 7.6, 1.6 Hz, 1 H), 7.48–7.37 (m, 2 H), 7.14 (td, *J* = 7.5, 0.8 Hz, 1 H), 7.06 (d, *J* = 8.4 Hz, 1 H), 3.78 (s, 3 H); <sup>13</sup>C NMR (100 MHz, CDCl<sub>3</sub>) δ 165.8, 156.5, 144.1, 143.6, 133.5, 131.6, 129.9, 125.7, 125.1, 122.9, 121.2, 120.3, 115.5, 111.6, 55.7; HRMS (ESI) Calcd for C<sub>15</sub>H<sub>12</sub>N<sub>2</sub>NaO<sub>2</sub> [M+Na] 275.0794, Found 275.0791.

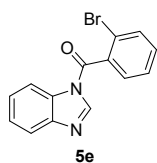

**(1H-benzo[d]imidazol-1-yl)(2-bromophenyl)methanone (5e) [New compound].**  $^1\text{H}$  NMR (400 MHz,  $\text{CDCl}_3$ )  $\delta$  8.20 (d,  $J = 5.4$  Hz, 1 H), 7.90 (s, 1 H), 7.87–7.81 (m, 1 H), 7.76–7.74 (m, 1 H), 7.60–7.39 (m, 5 H);  $^{13}\text{C}$  NMR (100 MHz,  $\text{CDCl}_3$ )  $\delta$  165.2, 144.2, 142.7, 135.3, 133.5, 132.6, 131.3, 129.2, 127.9, 126.029, 125.5, 120.6, 119.7, 115.4; HRMS (ESI) Calcd for  $\text{C}_{14}\text{H}_9\text{BrN}_2\text{NaO}$  [ $\text{M}+\text{Na}$ ] 322.9793, Found 322.9790.

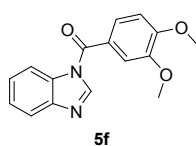

**(1H-benzo[d]imidazol-1-yl)(3,4-dimethoxyphenyl)methanone (5f) [New compound].**  $^1\text{H}$  NMR (400 MHz,  $\text{CDCl}_3$ )  $\delta$  8.31 (s, 1 H), 8.17–8.09 (m, 1 H), 7.89–7.80 (m, 1 H), 7.48–7.38 (m, 4 H), 7.06–6.95 (m, 1 H), 4.00 (s, 3 H), 3.96 (s, 3 H);  $^{13}\text{C}$  NMR (100 MHz,  $\text{CDCl}_3$ )  $\delta$  166.4, 153.5, 149.4, 144.0, 143.1, 132.3, 125.5, 125.0, 124.8, 124.1, 120.4, 115.2, 112.3, 110.4, 56.2, 56.1; HRMS (ESI) Calcd for  $\text{C}_{16}\text{H}_{14}\text{N}_2\text{NaO}_3$  [ $\text{M}+\text{Na}$ ] 305.0902, Found 305.0897.

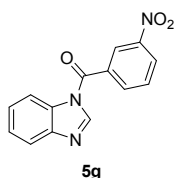

**(1H-benzo[d]imidazol-1-yl)(3-nitrophenyl)methanone (5g) [New compound].**  $^1\text{H}$  NMR (400 MHz,  $\text{CDCl}_3$ )  $\delta$  8.69 (t,  $J = 1.9$  Hz, 1 H), 8.56 (ddd,  $J = 8.3, 2.2, 1.0$  Hz, 1 H), 8.23–8.17 (m, 1 H), 8.16 (s, 1 H), 8.16–8.12 (m, 1 H), 7.91–7.81 (m, 2 H), 7.54–7.44 (m, 2 H);  $^{13}\text{C}$  NMR (100 MHz,  $\text{CDCl}_3$ )  $\delta$  164.6, 148.4, 144.1, 142.1, 134.8, 134.5, 131.8, 130.5, 127.6, 126.3, 125.9, 124.5, 120.9, 115.5; HRMS (ESI) Calcd for  $\text{C}_{14}\text{H}_{10}\text{N}_3\text{O}_3$  [ $\text{M}+\text{H}$ ] 268.0712, Found 268.0717.

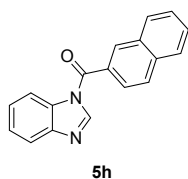

**(1*H*-benzo[*d*]imidazol-1-yl)(naphthalen-2-yl)methanone (5h) [New compound].** <sup>1</sup>H

NMR (400 MHz, CDCl<sub>3</sub>) δ 8.31 (s, 2 H), 8.26–8.19 (m, 1 H), 8.04 (d, *J* = 8.5 Hz, 1 H), 7.96 (d, *J* = 8.7 Hz, 2 H), 7.90–7.83 (m, 2 H), 7.72–7.66 (m, 1 H), 7.65–7.60 (m, 1 H), 7.50–7.42 (m, 2 H); <sup>13</sup>C NMR (100 MHz, CDCl<sub>3</sub>) δ 167.1, 144.1, 143.2, 135.3, 132.2, 131.1, 129.9, 129.2, 129.0, 128.0, 127.5, 125.7, 125.2, 125.0, 120.6, 115.4; HRMS (ESI) Calcd for C<sub>18</sub>H<sub>12</sub>N<sub>2</sub>NaO [M+Na] 295.0849, Found 295.0842.

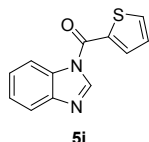

**(1*H*-benzo[*d*]imidazol-1-yl)(thiophen-2-yl)methanone (5i) [New compound].** <sup>1</sup>H

NMR (400 MHz, CDCl<sub>3</sub>) δ 8.54 (s, 1 H), 8.23–8.14 (m, 1 H), 7.88–7.80 (m, 2 H), 7.81–7.76 (m, 1 H), 7.50–7.39 (m, 2 H), 7.28–7.26 (m, 1 H); <sup>13</sup>C NMR (100 MHz, CDCl<sub>3</sub>) δ 159.9, 143.9, 142.2, 135.7, 134.5, 134.3, 132.2, 128.2, 125.7, 125.2, 120.5, 115.3; HRMS (ESI) Calcd for C<sub>12</sub>H<sub>9</sub>N<sub>2</sub>OS [M+H] 229.0431, Found 229.0430.

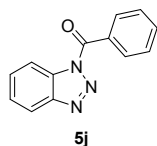

**(1*H*-benzo[*d*][1,2,3]triazol-1-yl)(phenyl)methanone (5j)<sup>2</sup>.** <sup>1</sup>H NMR (400 MHz, CDCl<sub>3</sub>) δ

8.40 (d, *J* = 8.3 Hz, 1 H), 8.25–8.19 (m, 2 H), 8.17 (d, *J* = 8.3 Hz, 1 H), 7.74–7.67 (m, 2 H), 7.62–7.52 (m, 3 H); <sup>13</sup>C NMR (100 MHz, CDCl<sub>3</sub>) δ 166.7, 145.7, 133.7, 132.3, 131.7, 131.5, 130.4, 128.4, 126.3, 120.2, 114.8; HRMS (ESI) Calcd for C<sub>13</sub>H<sub>9</sub>N<sub>3</sub>NaO [M+Na] 246.0630, Found 246.0638.

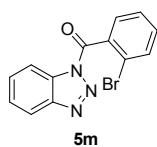

**1*H*-benzo[*d*][1,2,3]triazol-1-yl(2-bromophenyl)methanone (5m) [New compound].** <sup>1</sup>H NMR (400 MHz, CDCl<sub>3</sub>) δ 8.41 (dd, *J* = 8.3, 0.7 Hz, 1 H), 8.16 (dd, *J* = 8.3, 0.7 Hz,

1 H), 7.77–7.70 (m, 2 H), 7.64–7.60 (m, 1 H), 7.60–7.54 (m, 1 H), 7.53–7.44 (m, 2 H); <sup>13</sup>C NMR (100

MHz, CDCl<sub>3</sub>)  $\delta$  166.4, 146.2, 135.0, 133.2, 132.5, 131.3, 130.7, 130.1, 127.2, 126.7, 120.6, 120.4, 114.4; HRMS (ESI) Calcd for C<sub>13</sub>H<sub>8</sub>BrN<sub>3</sub>NaO [M+Na] 323.9736, Found 323.9743.

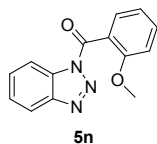

**(1H-benzo[d][1,2,3]triazol-1-yl)(2-methoxyphenyl)methanone (5n) [New compound].** <sup>1</sup>H NMR (400 MHz, CDCl<sub>3</sub>)  $\delta$  8.39 (d, *J* = 8.3 Hz, 1 H), 8.13 (d, *J* = 8.3 Hz, 1 H), 7.69 (ddd, *J* = 8.2, 7.2, 1.0 Hz, 1 H), 7.63–7.50 (m, 3 H), 7.12 (td, *J* = 7.5, 0.8 Hz, 1 H), 7.06 (d, *J* = 8.4 Hz, 1 H), 3.77 (s, 3 H); <sup>13</sup>C NMR (100 MHz, CDCl<sub>3</sub>)  $\delta$  166.9, 157.8, 146.0, 133.5, 131.4, 130.3, 130.2, 126.1, 122.7, 120.5, 120.1, 114.4, 111.7, 55.8; HRMS (ESI) Calcd for C<sub>14</sub>H<sub>11</sub>N<sub>3</sub>NaO<sub>2</sub> [M+Na] 276.0738, Found 276.0743.

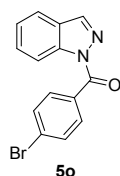

**(4-bromophenyl)(1H-indazol-1-yl)methanone (5o) [New compound].** <sup>1</sup>H NMR (400 MHz, CDCl<sub>3</sub>)  $\delta$  8.56 (dd, *J* = 8.4, 0.7 Hz, 1 H), 8.21 (d, *J* = 0.6 Hz, 1 H), 8.01–7.93 (m, 2 H), 7.83–7.76 (m, 1 H), 7.68–7.65 (m, 2 H), 7.64–7.61 (m, 1 H), 7.48–7.39 (m, 1 H); <sup>13</sup>C NMR (100 MHz, CDCl<sub>3</sub>)  $\delta$  167.3, 140.6, 140.1, 132.6, 132.1, 131.3, 129.7, 127.3, 126.1, 125.0, 121.0, 115.9; HRMS (ESI) Calcd for C<sub>14</sub>H<sub>9</sub>BrN<sub>2</sub>NaO [M+Na] 322.9789, Found 322.9790.

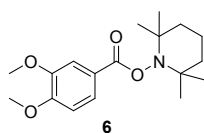

**2,2,6,6-tetramethylpiperidin-1-yl 3,4-dimethoxybenzoate (6).** <sup>1</sup>H NMR (400 MHz, CDCl<sub>3</sub>)  $\delta$  7.67 (dd, *J* = 8.4, 1.5 Hz, 1 H), 7.54 (d, *J* = 1.5 Hz, 1 H), 6.86 (d, *J* = 8.4 Hz, 1 H), 3.89 (s, 6 H), 1.76–1.39 (m, 6 H), 1.22 (s, 6 H), 1.07 (s, 6 H); <sup>13</sup>C NMR (100 MHz, CDCl<sub>3</sub>)  $\delta$  166.0, 152.7, 148.6, 123.0, 121.9, 112.1, 110.1, 60.1, 55.8, 55.77, 38.8, 31.8, 20.6, 16.8; HRMS (ESI) Calcd for C<sub>18</sub>H<sub>27</sub>NNaO<sub>4</sub> [M+Na] 344.1825, Found 344.1832.





## References:

- (1) H. R. J. Yajnanarayana and W. G. Harry, *J. Org. Chem.* 1991, **56**, 865.
- (2) (a) R. K. Alam and P. Alfredo, *J. Org. Chem.* 1990, **65**, 3679; (b) N. G. Gaylord and J. M. Naughton, *J. Org. Chem.* 1957, **22**, 1022.

# Copies of $^1\text{H}$ and $^{13}\text{C}$ NMR Spectra

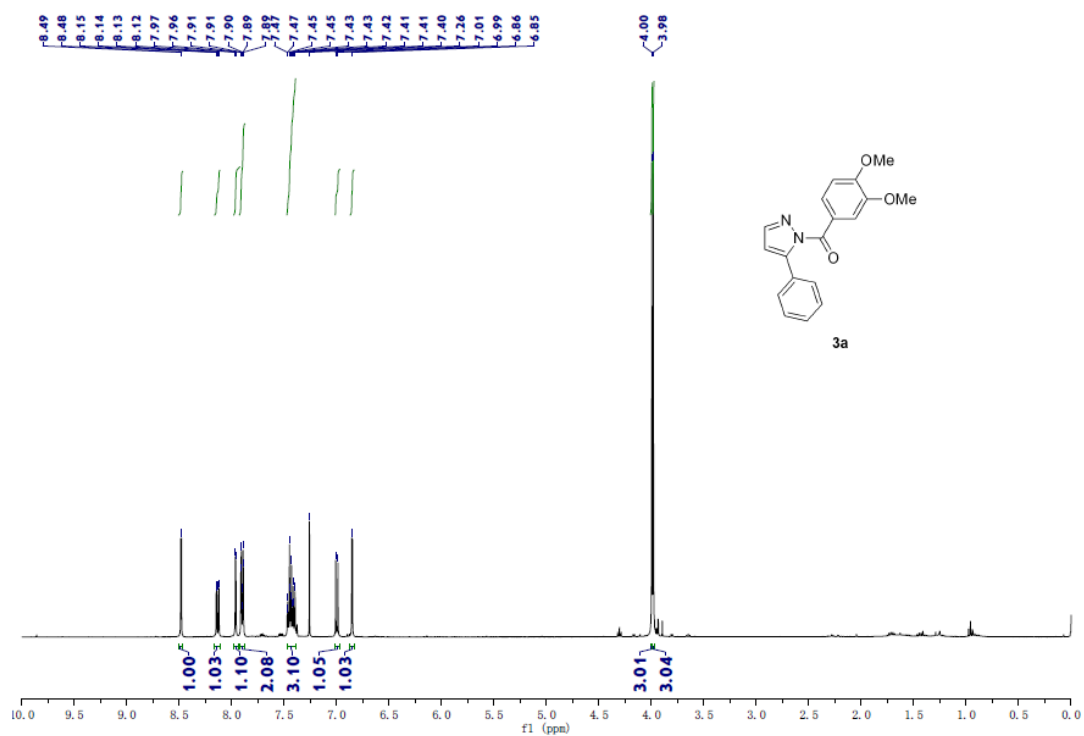

## $^1\text{H}$ NMR of product **3a**

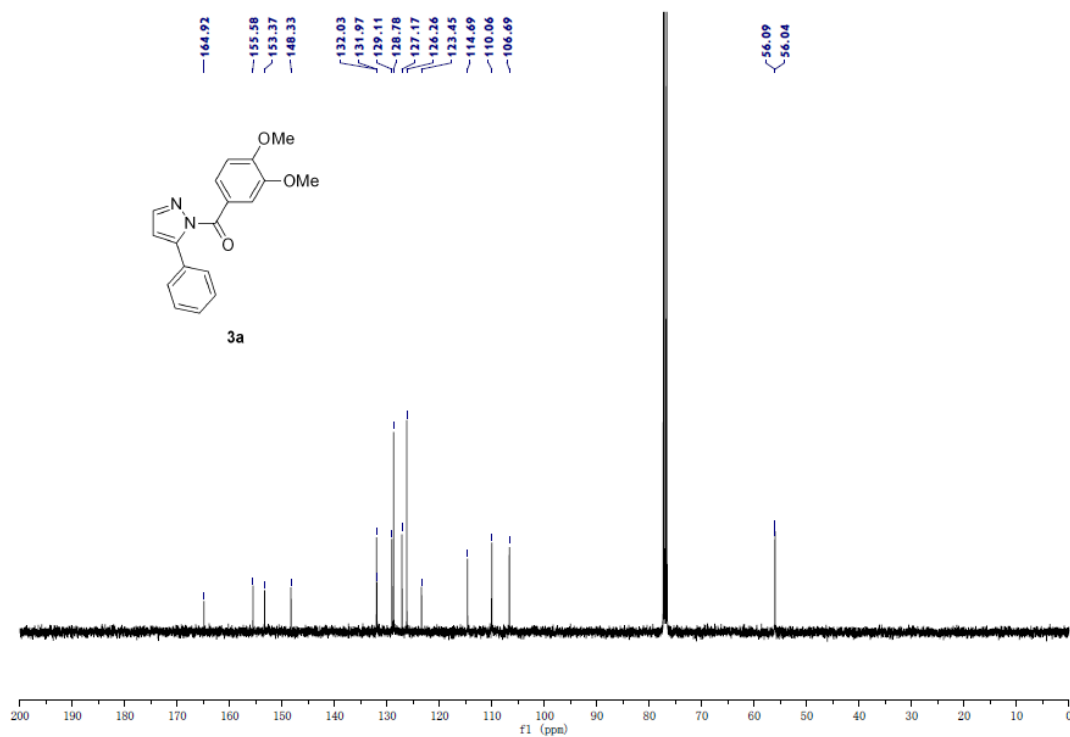

## $^{13}\text{C}$ NMR of product **3a**

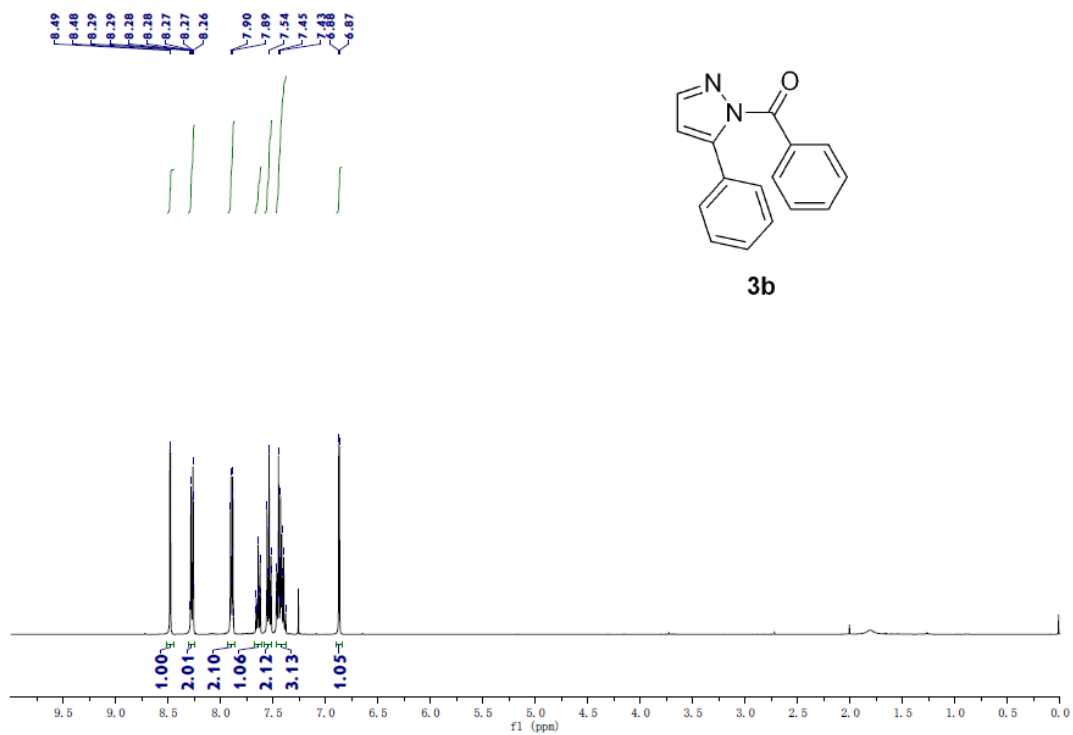

<sup>1</sup>H NMR of product **3b**

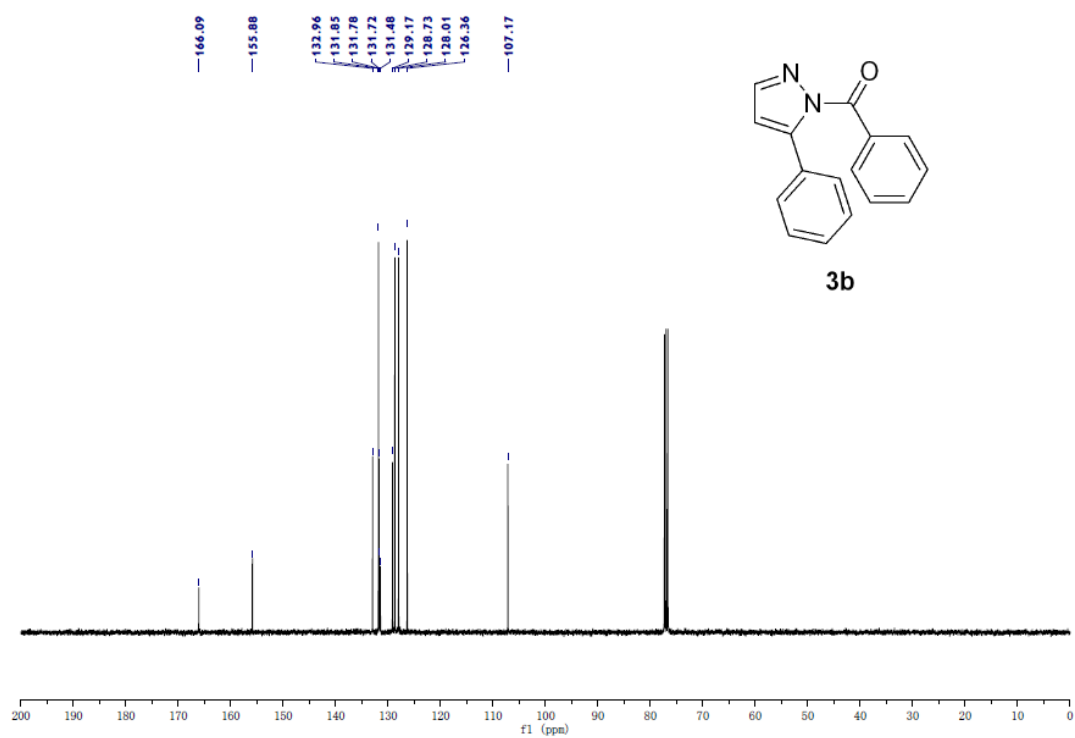

<sup>13</sup>C NMR of product **3b**

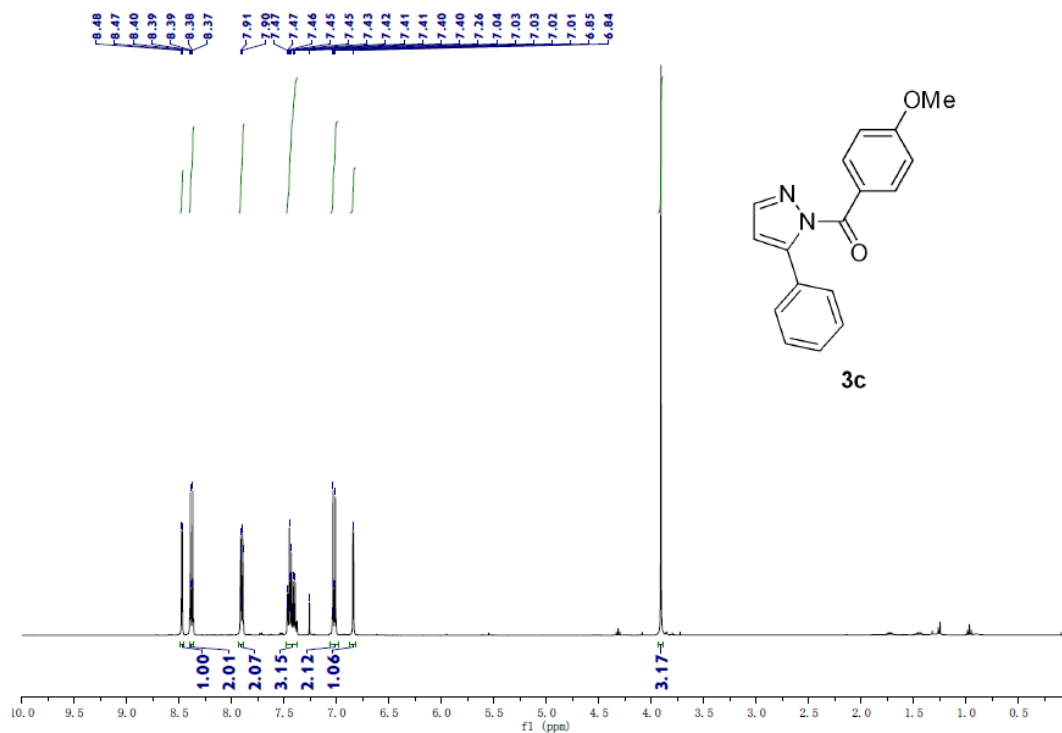

<sup>1</sup>H NMR of product 3c

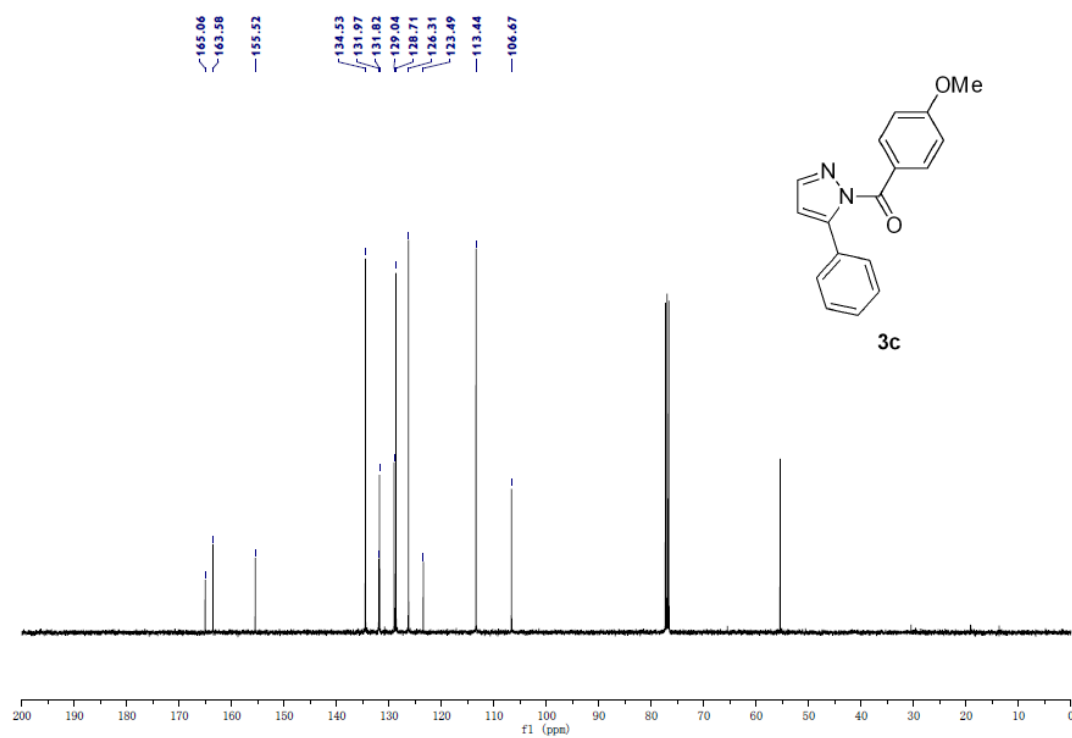

<sup>13</sup>C NMR of product 3c

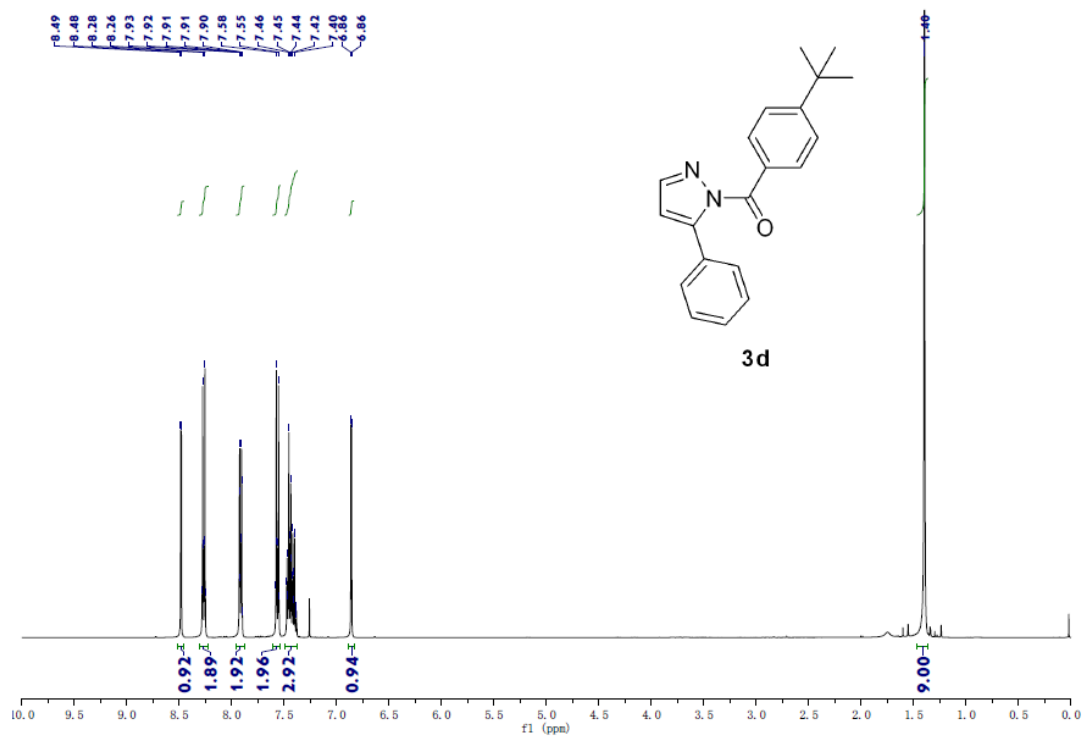

<sup>1</sup>H NMR of product **3d**

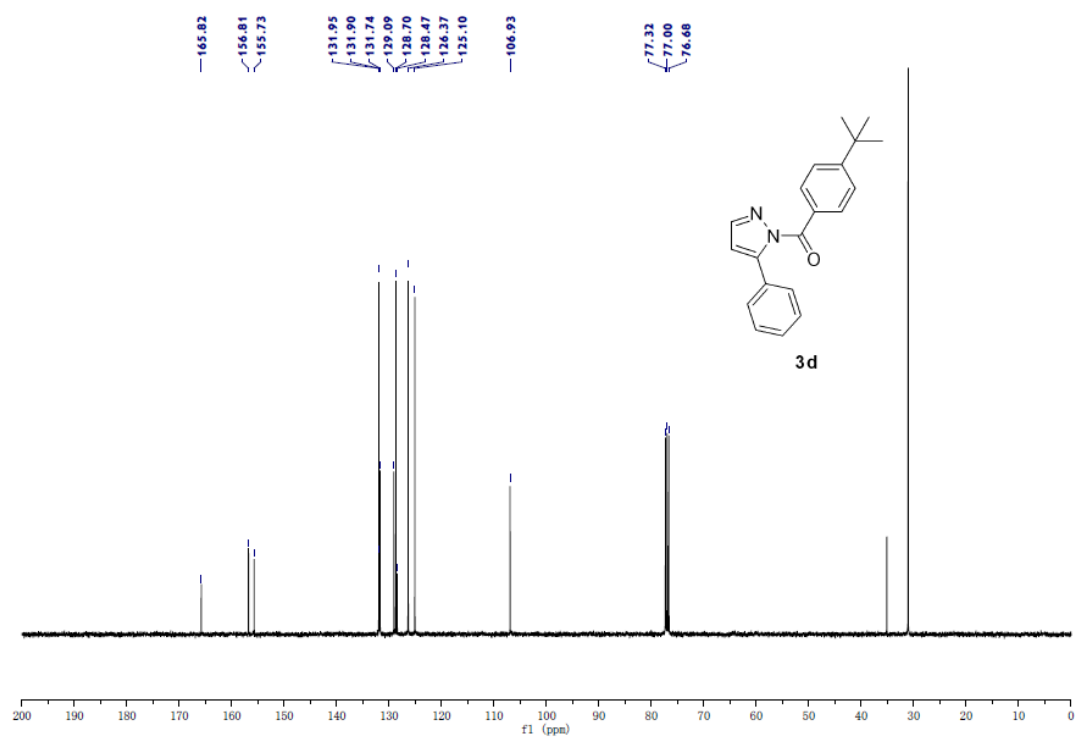

<sup>13</sup>C NMR of product **3d**

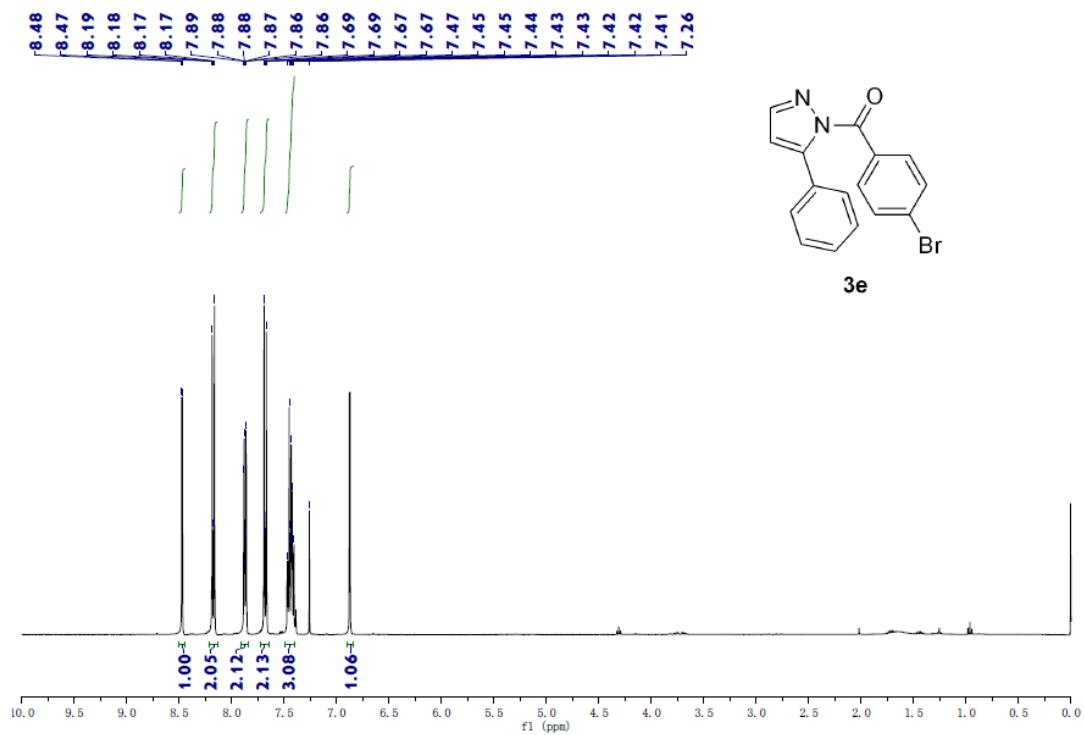

$^1\text{H}$  NMR of product **3e**

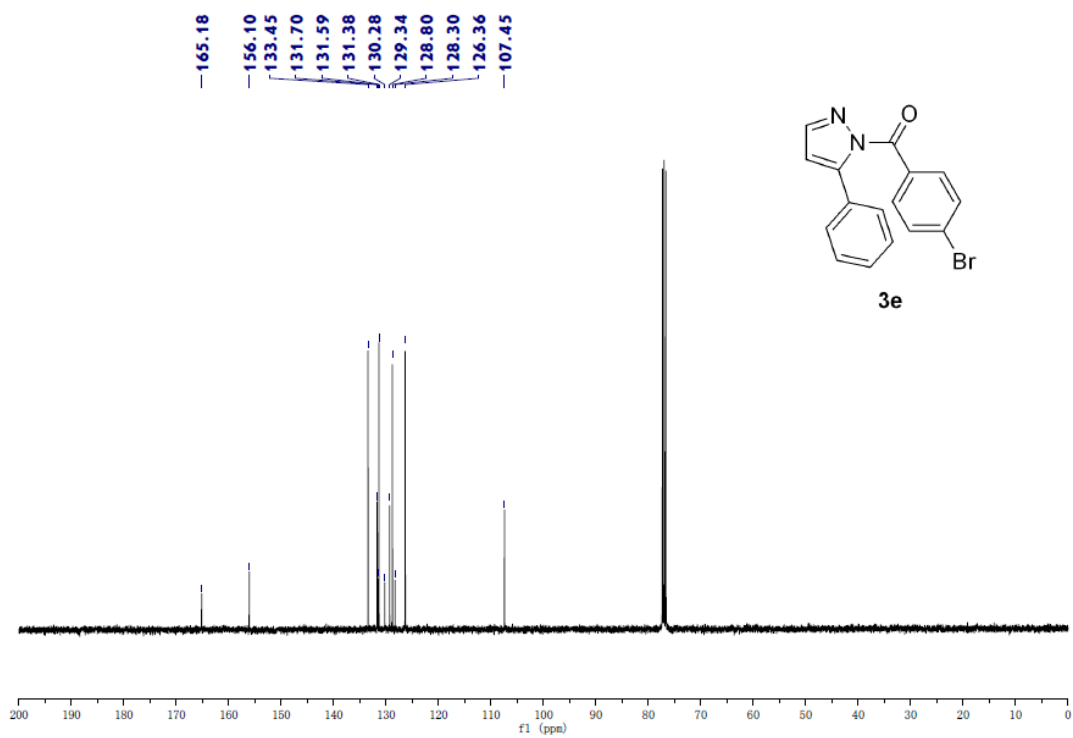

$^{13}\text{C}$  NMR of product **3e**

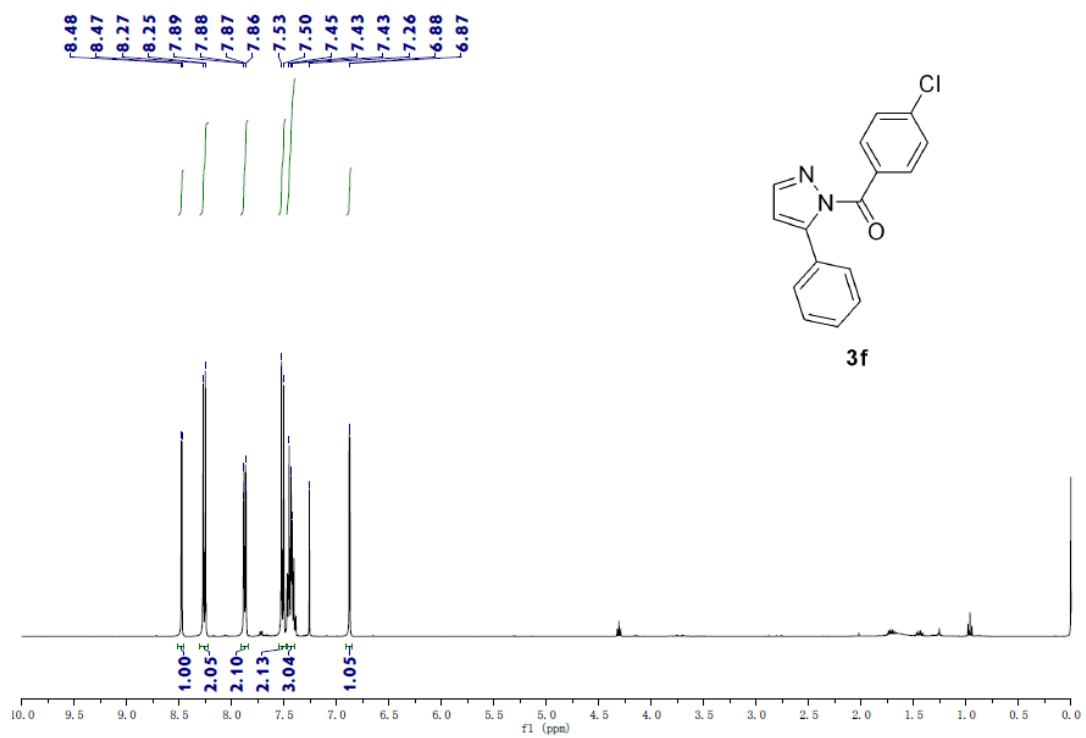

$^1\text{H}$  NMR of product **3f**

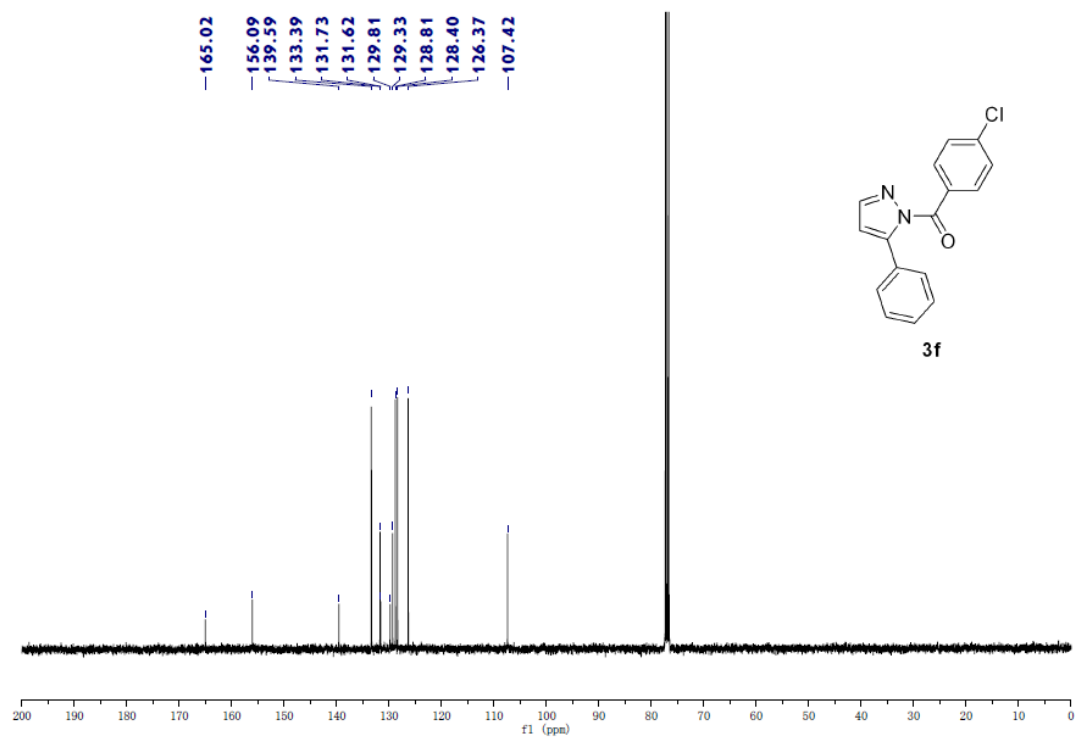

$^{13}\text{C}$  NMR of product **3f**

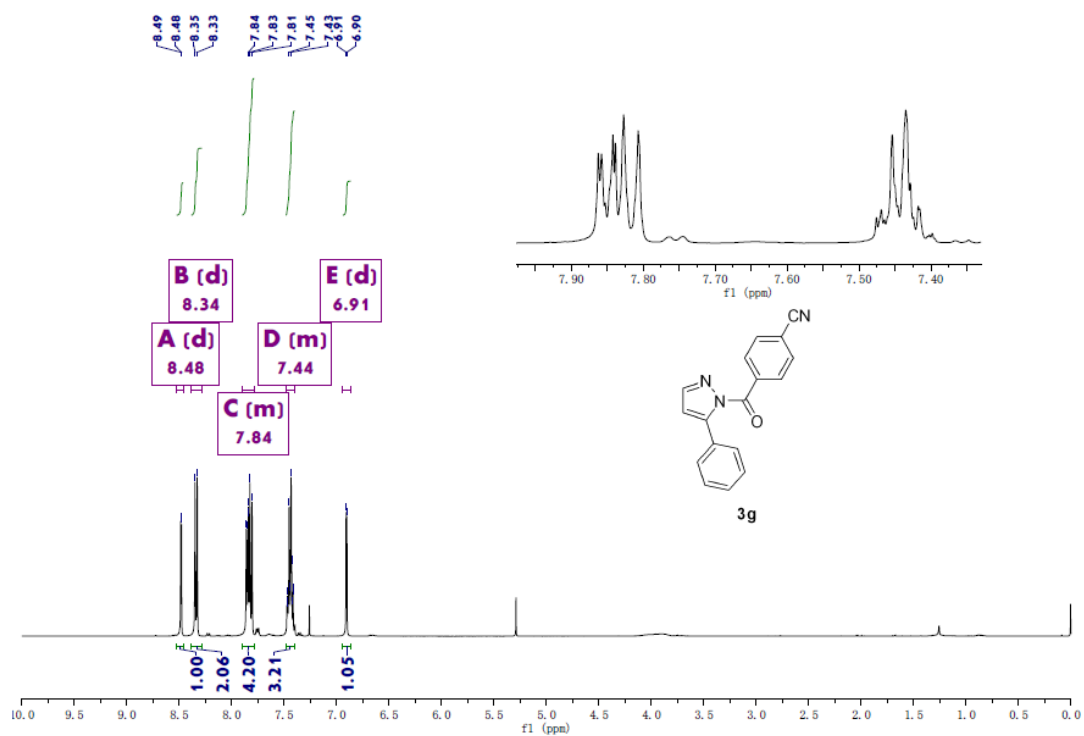

$^1\text{H}$  NMR of product **3g**

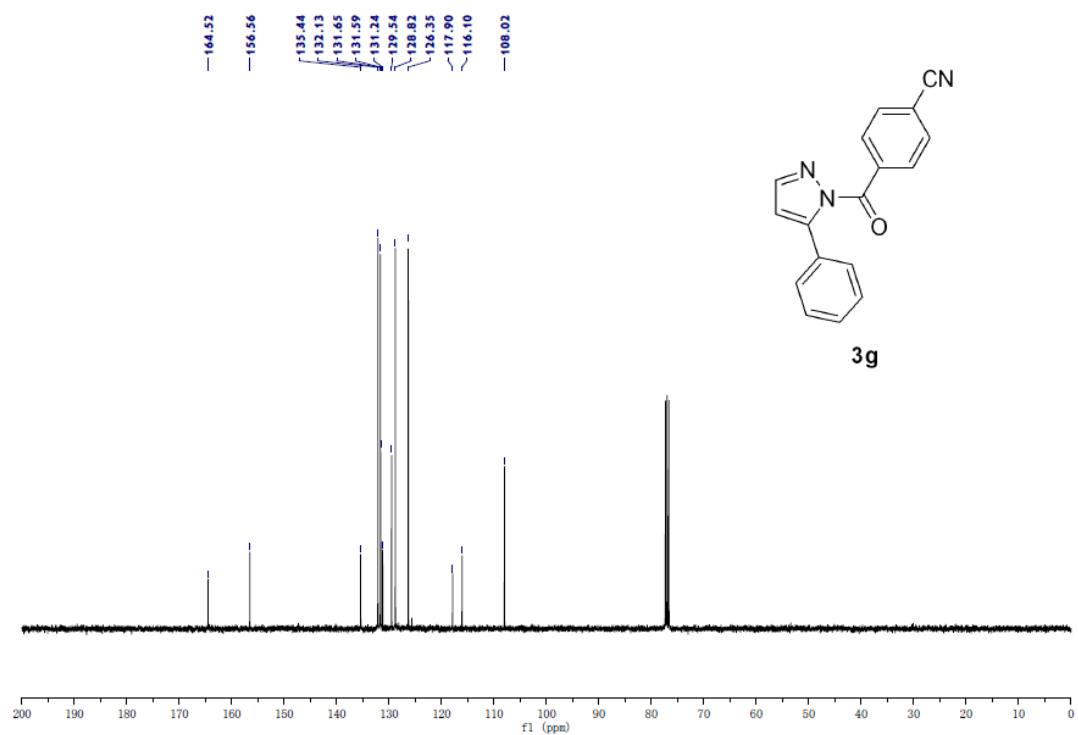

$^{13}\text{C}$  NMR of product **3g**



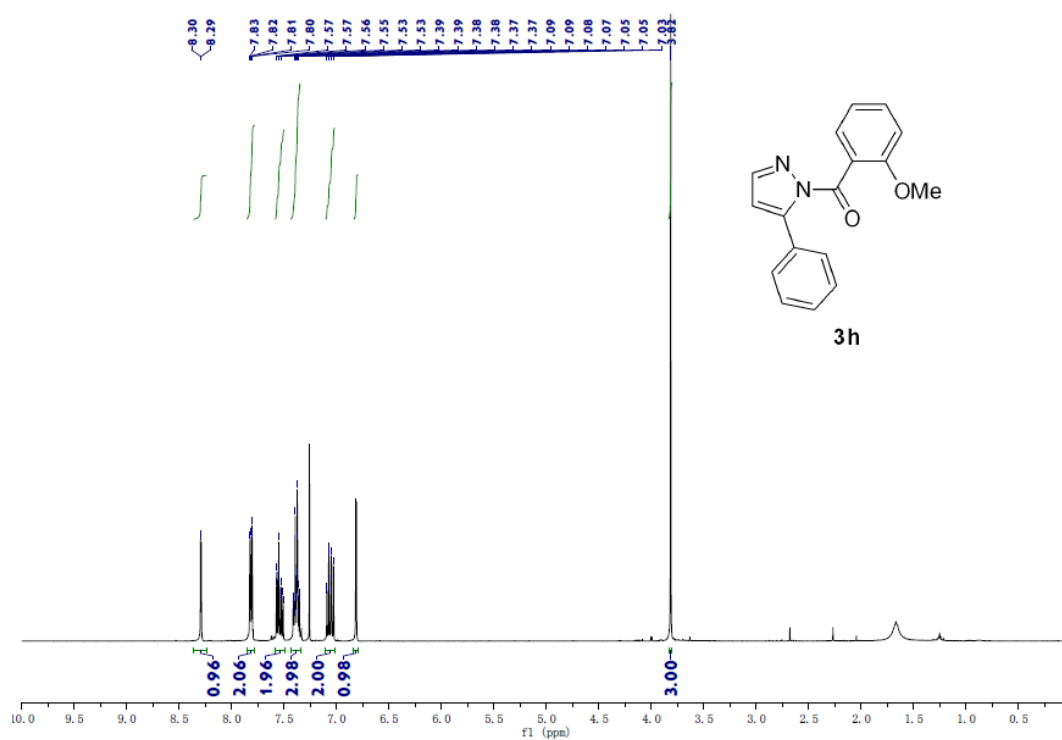

<sup>1</sup>H NMR of product **3h**

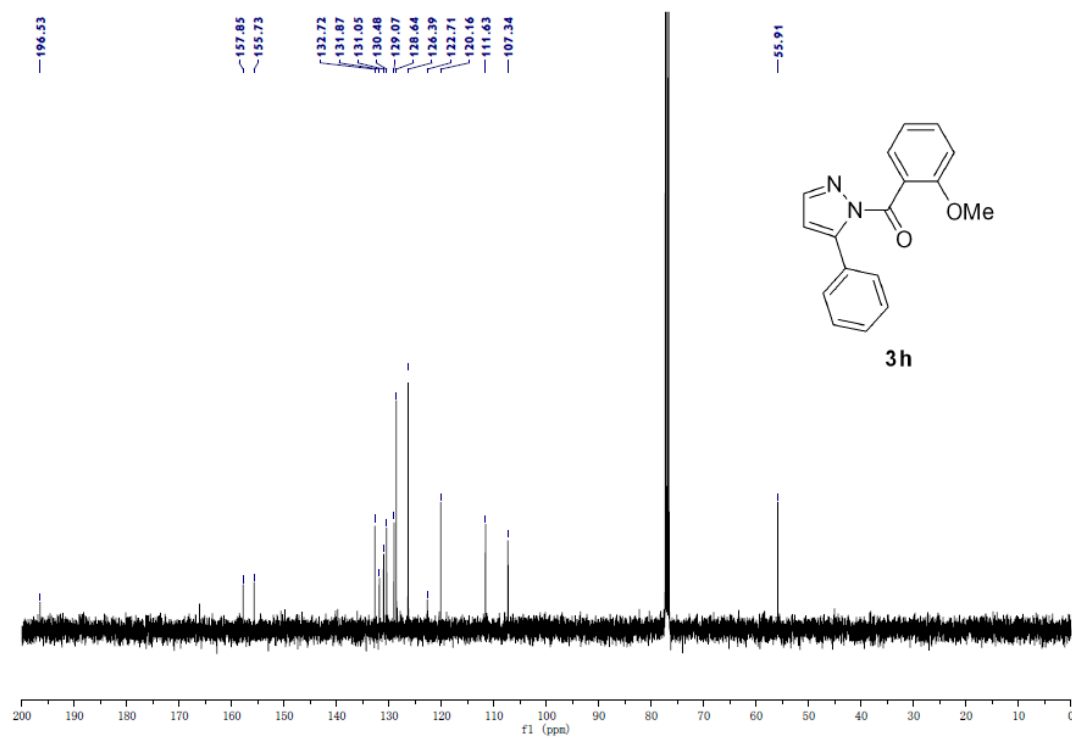

<sup>13</sup>C NMR of product **3h**

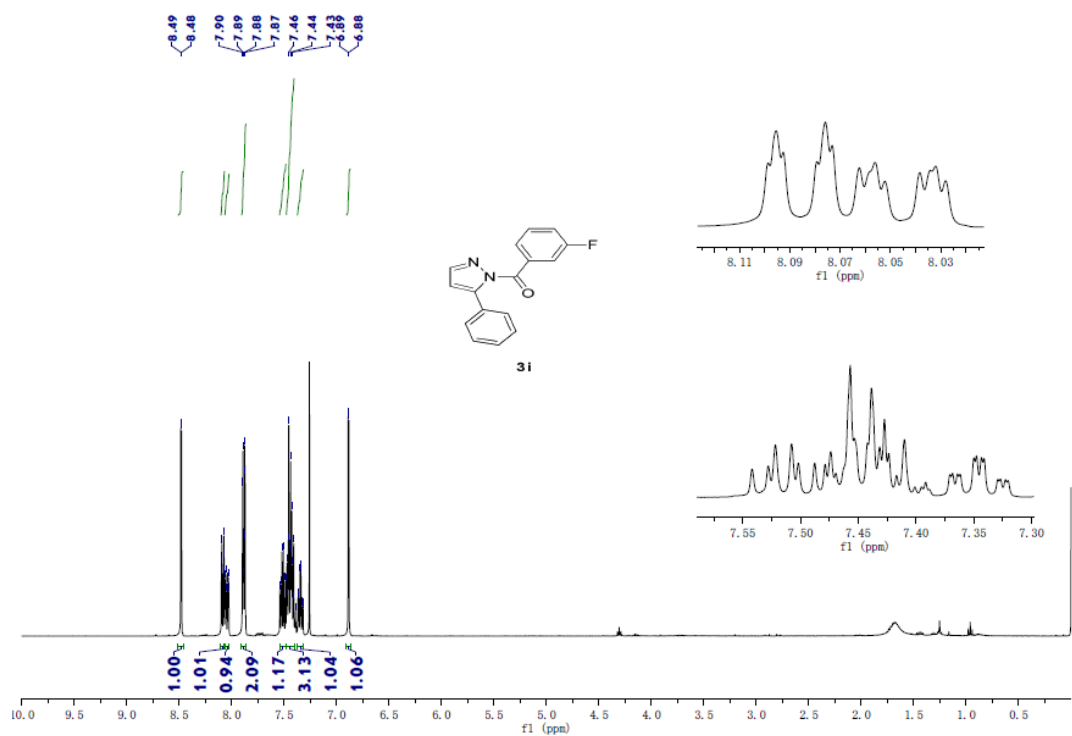

<sup>1</sup>H NMR of product **3i**

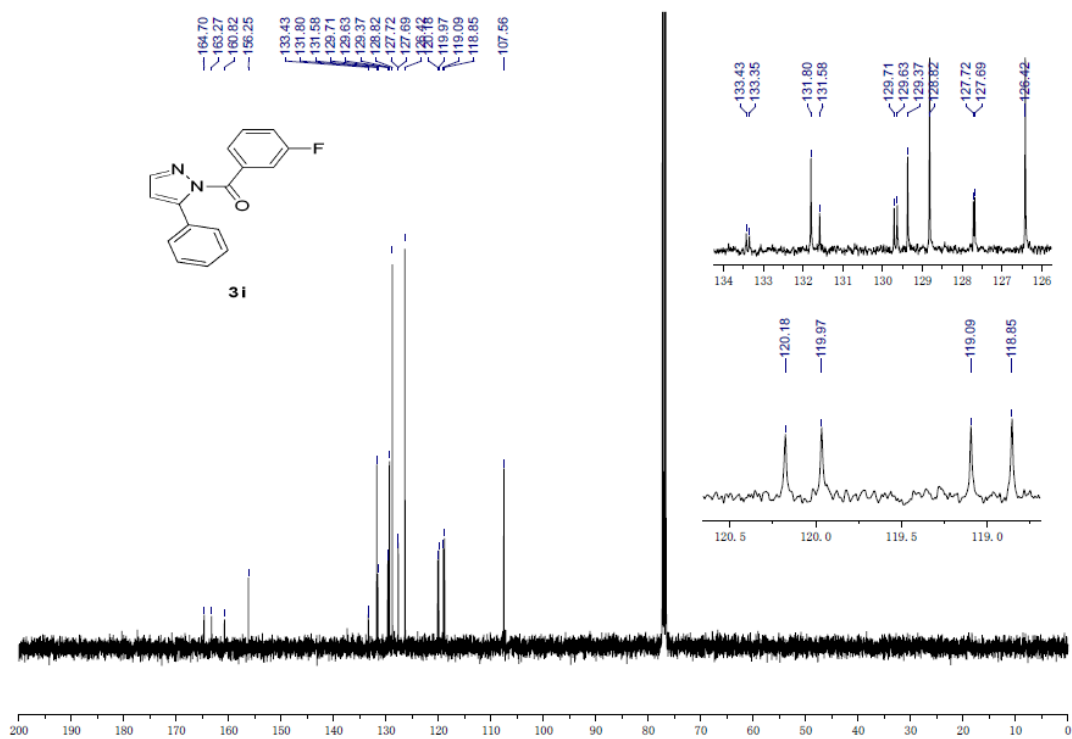

<sup>13</sup>C NMR of product **3i**

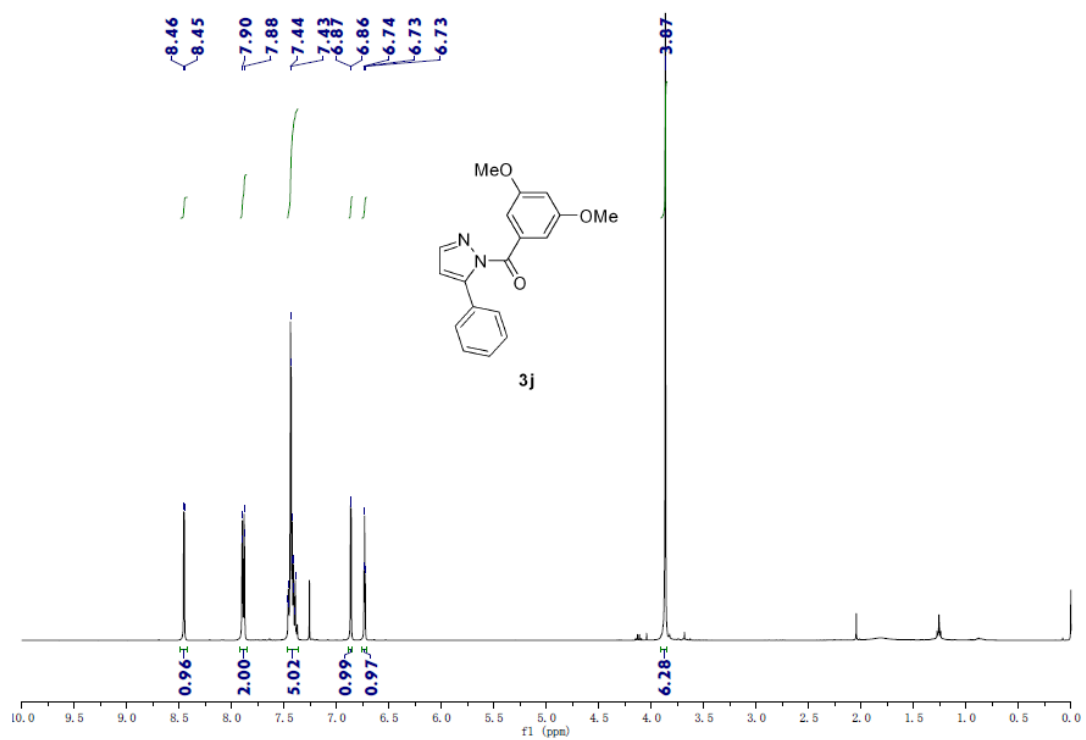

$^1\text{H}$  NMR of product **3j**

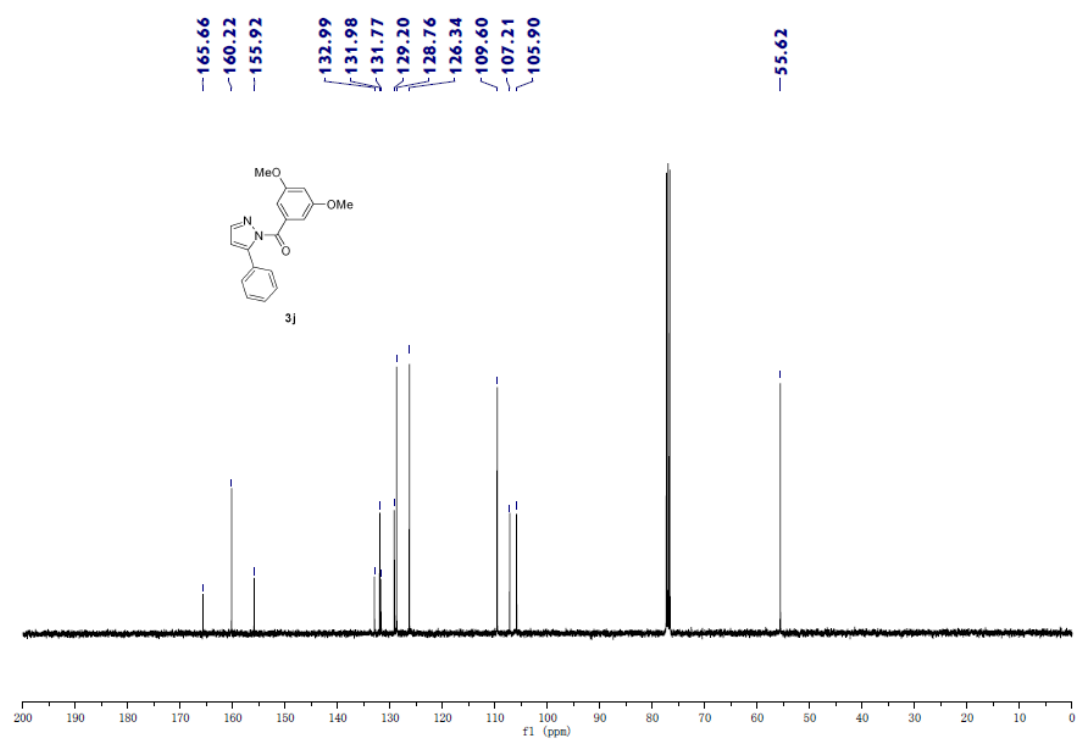

$^{13}\text{C}$  NMR of product **3j**

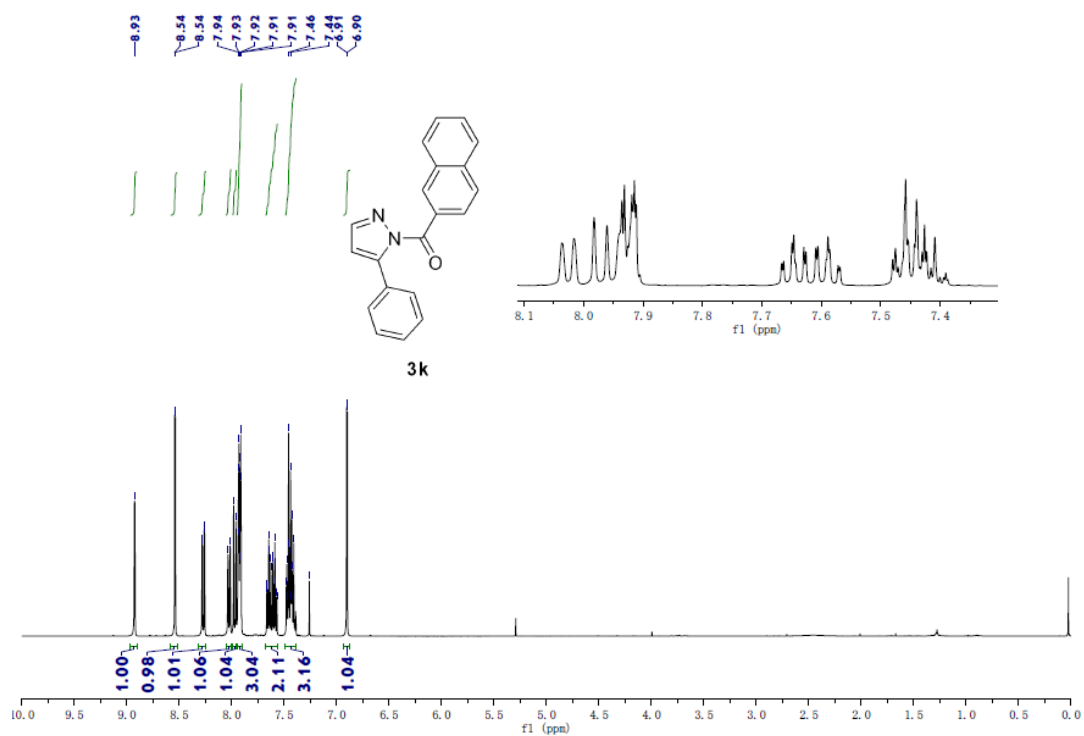

<sup>1</sup>H NMR of product 3k

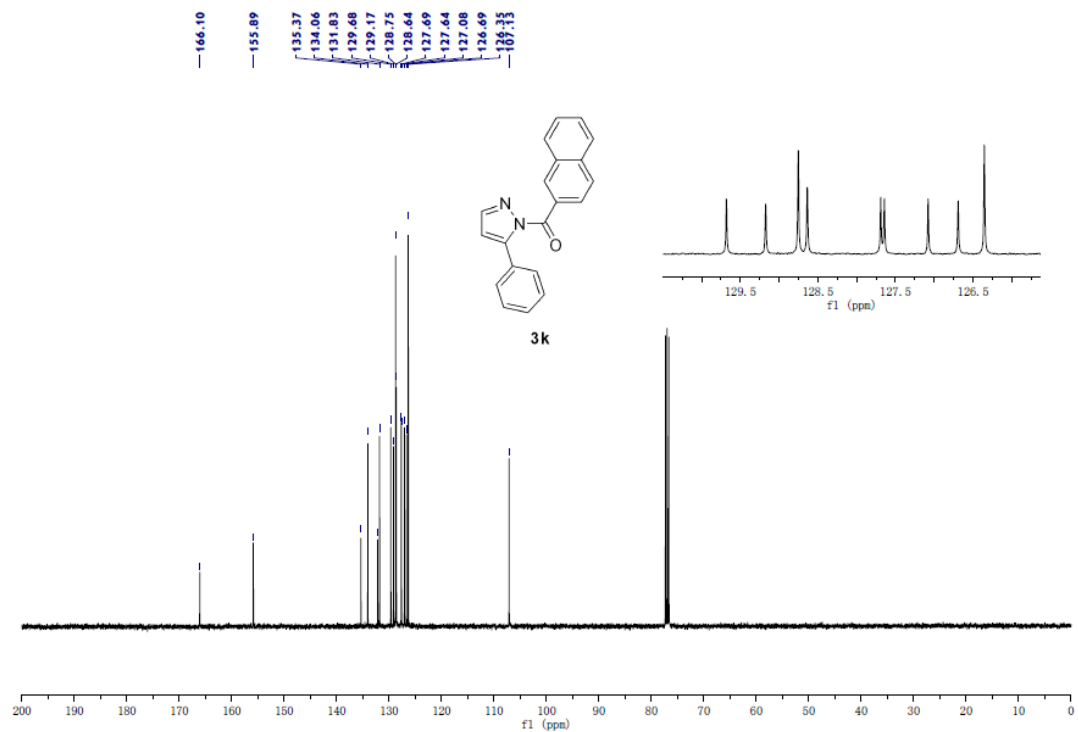

<sup>13</sup>C NMR of product 3k

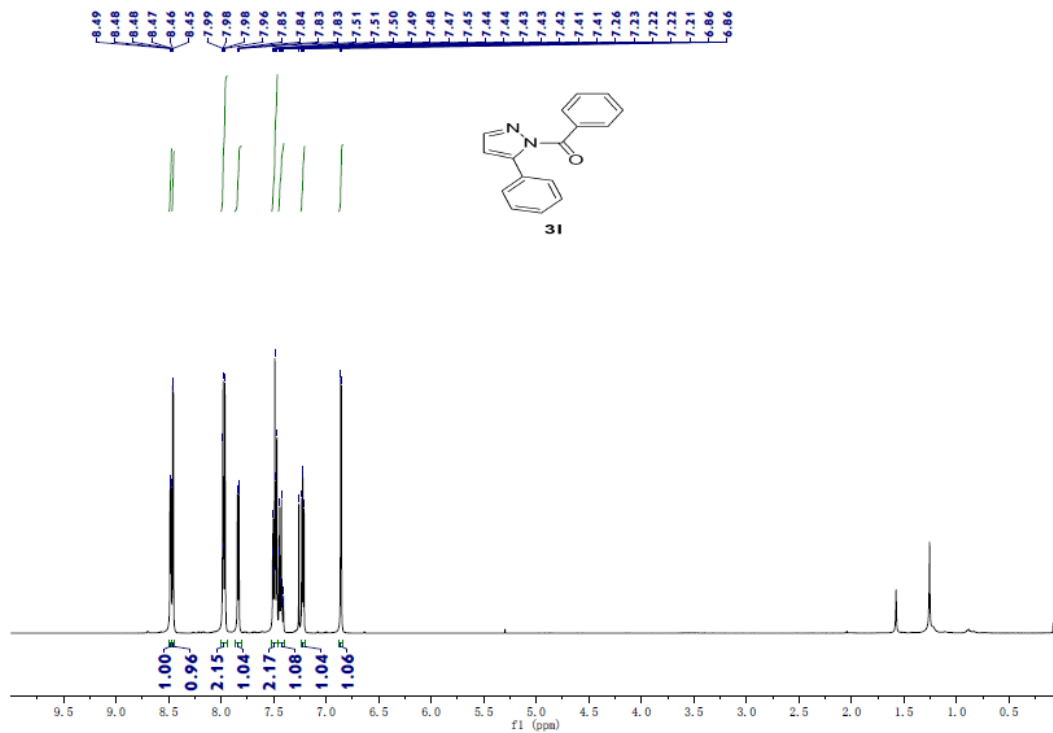

<sup>1</sup>H NMR of product 31

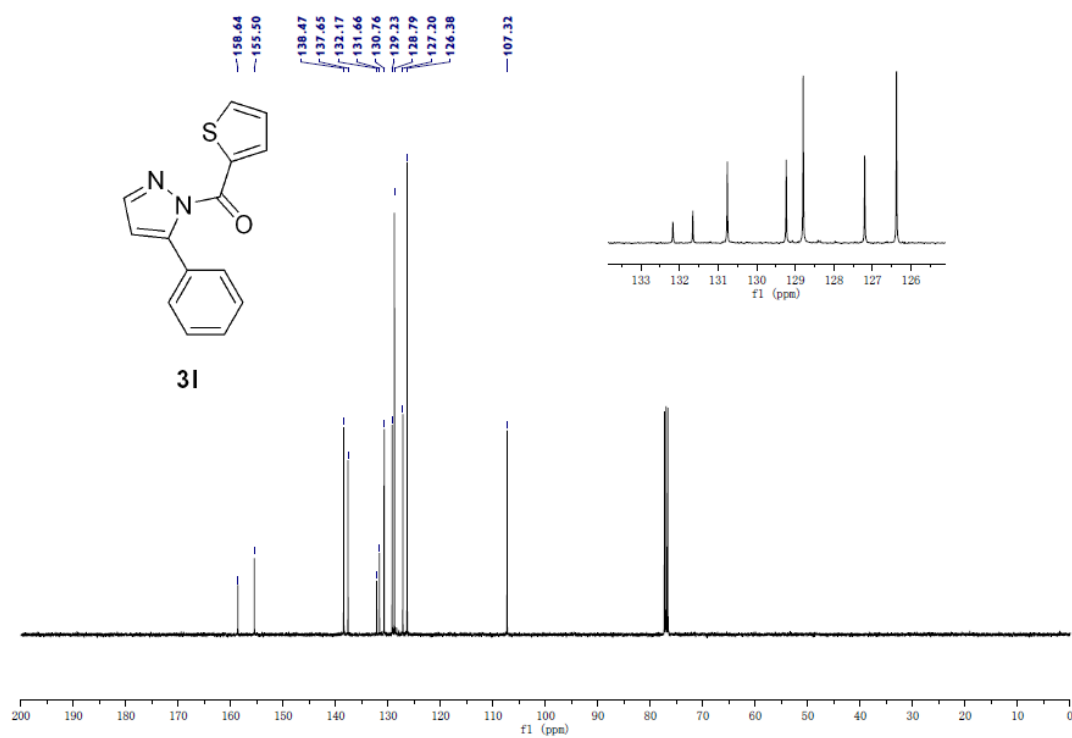

<sup>13</sup>C NMR of product 31

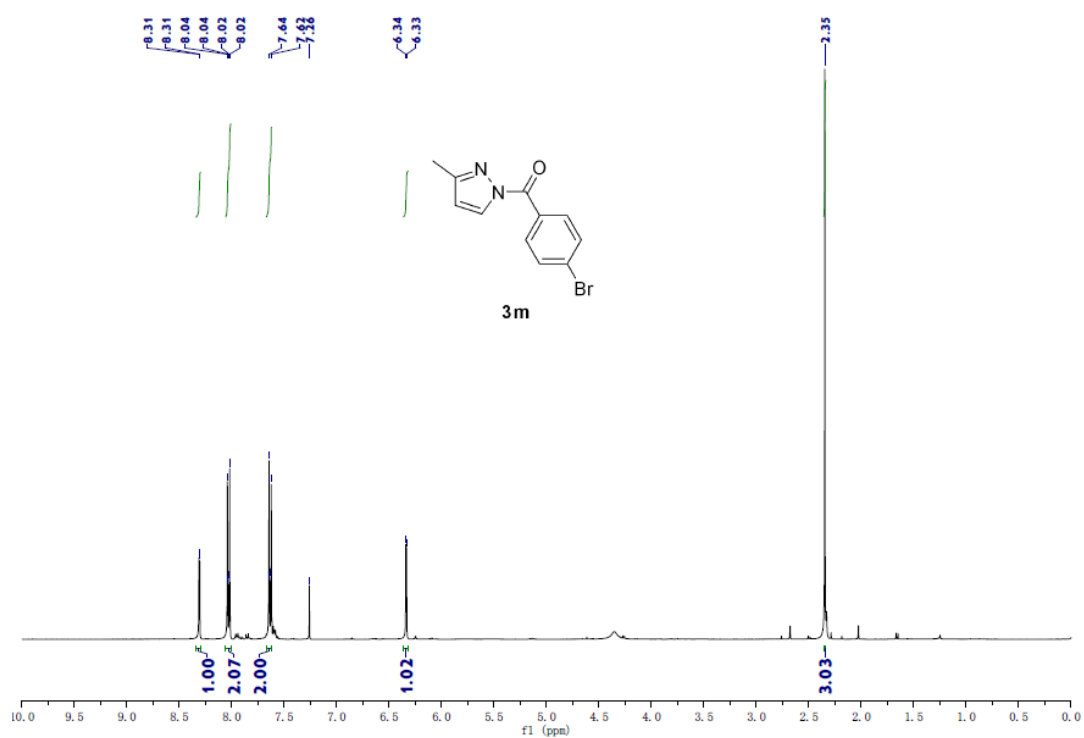

<sup>1</sup>H NMR of product **3m**

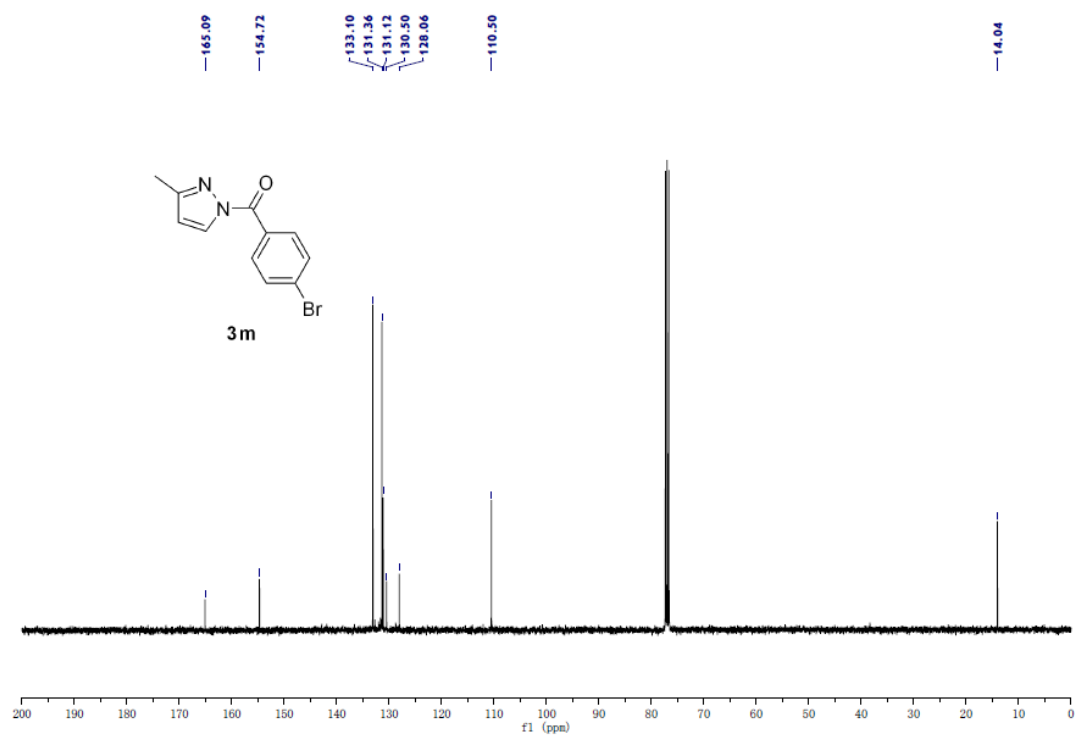

<sup>13</sup>C NMR of product **3m**

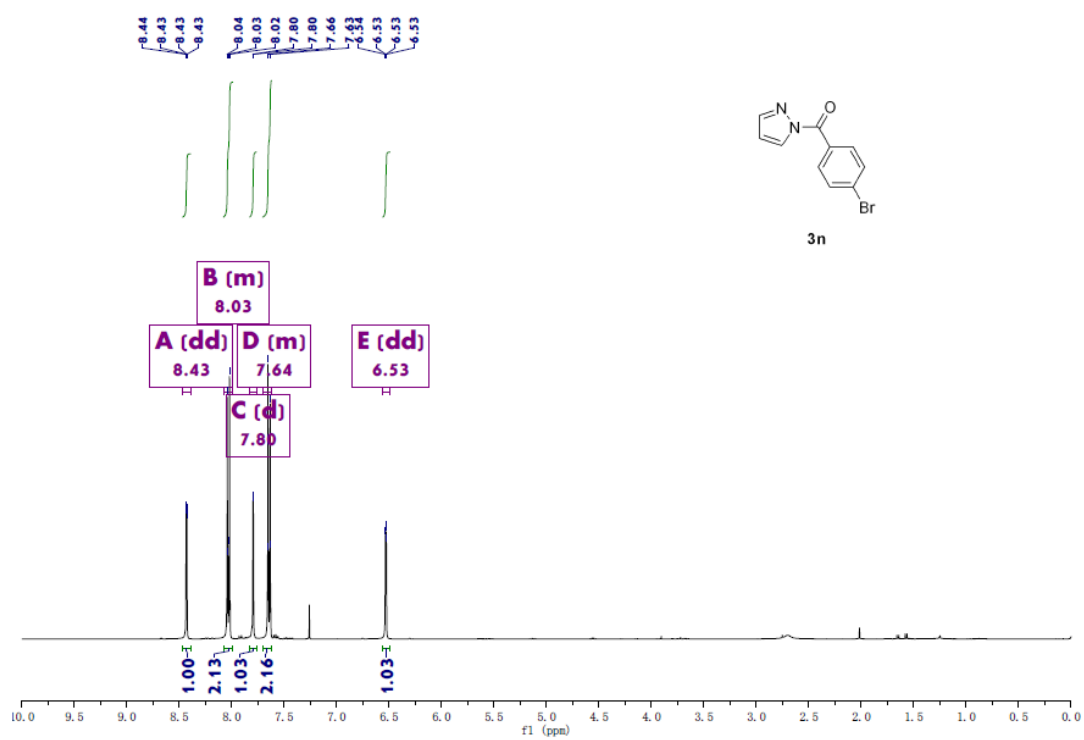

**<sup>1</sup>H NMR of product 3n**

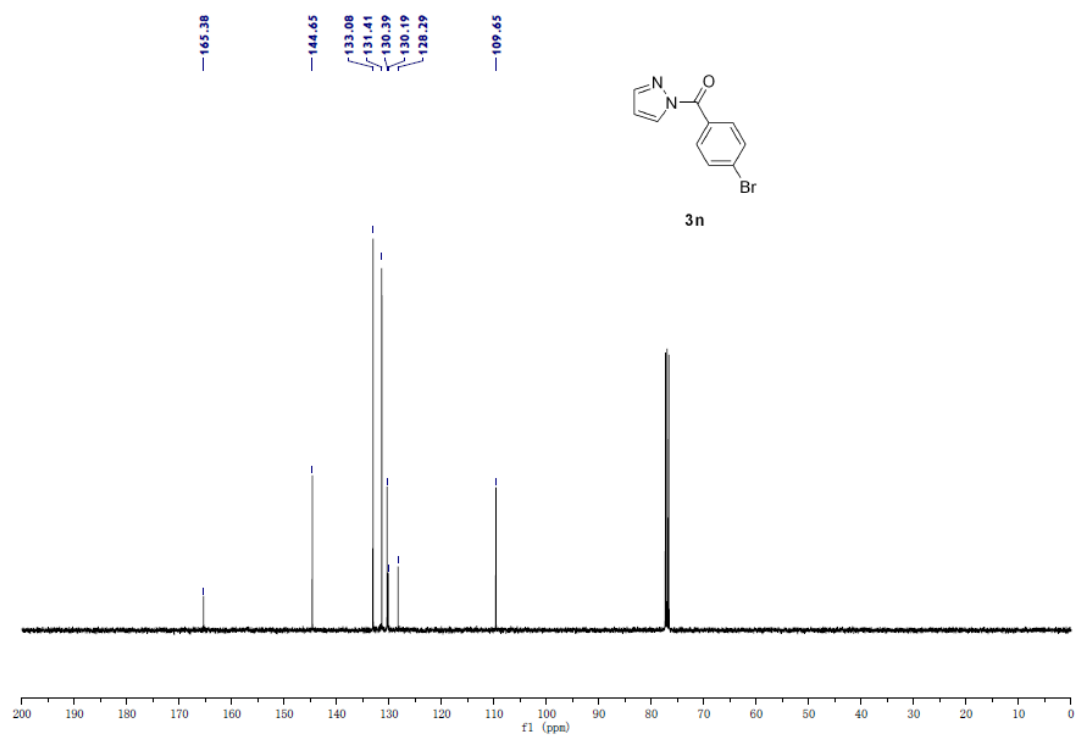

**<sup>13</sup>C NMR of product 3n**

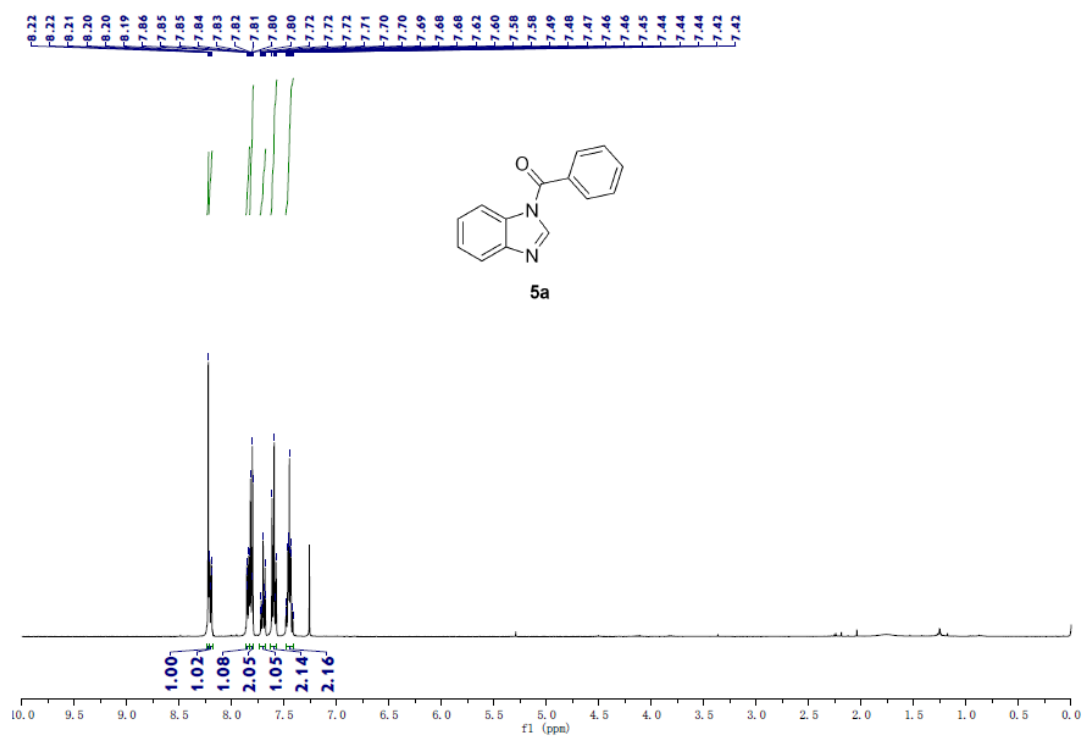

<sup>1</sup>H NMR of product **5a**

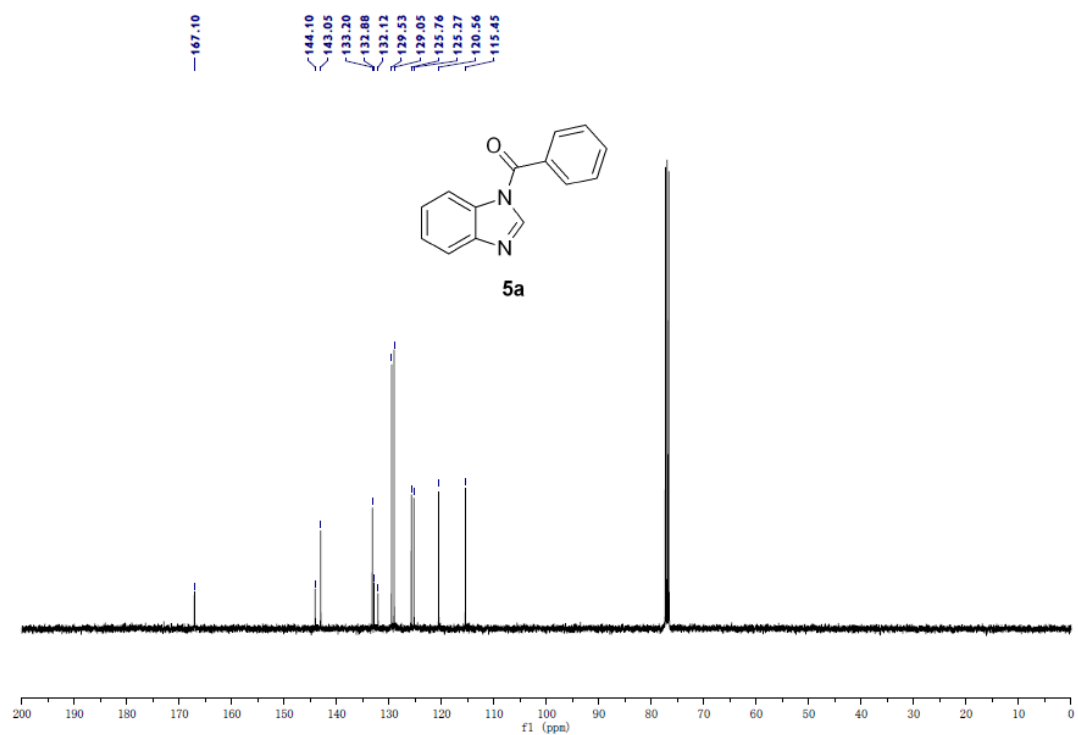

<sup>13</sup>C NMR of product **5a**



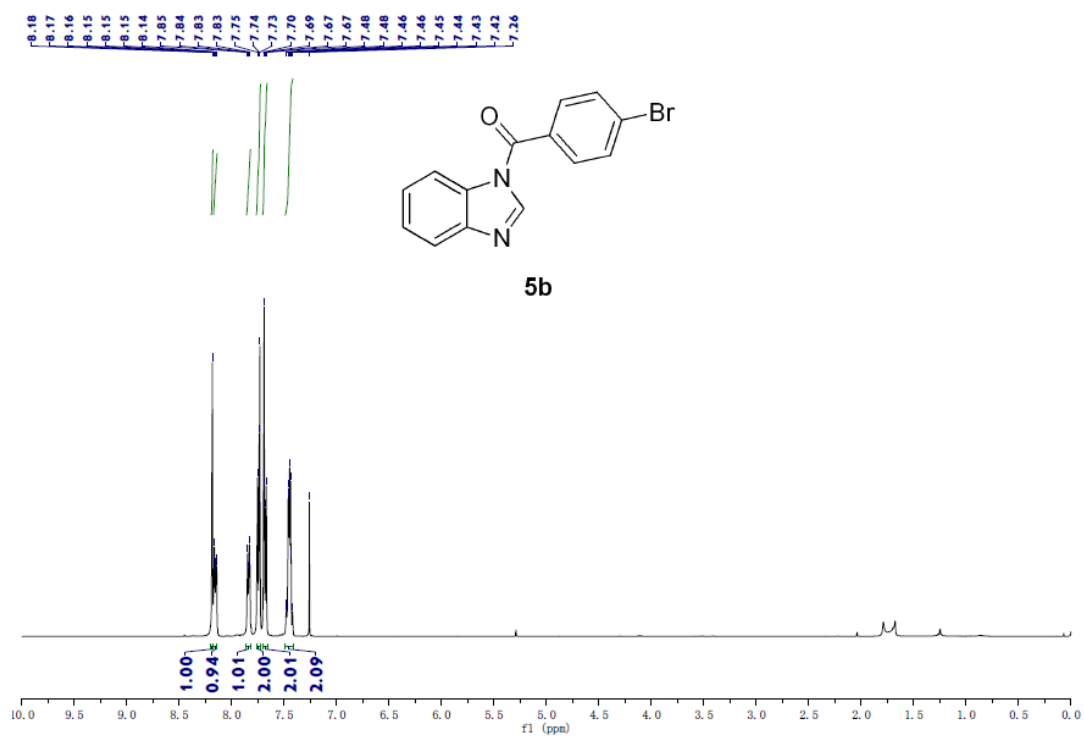

<sup>1</sup>H NMR of product **5b**

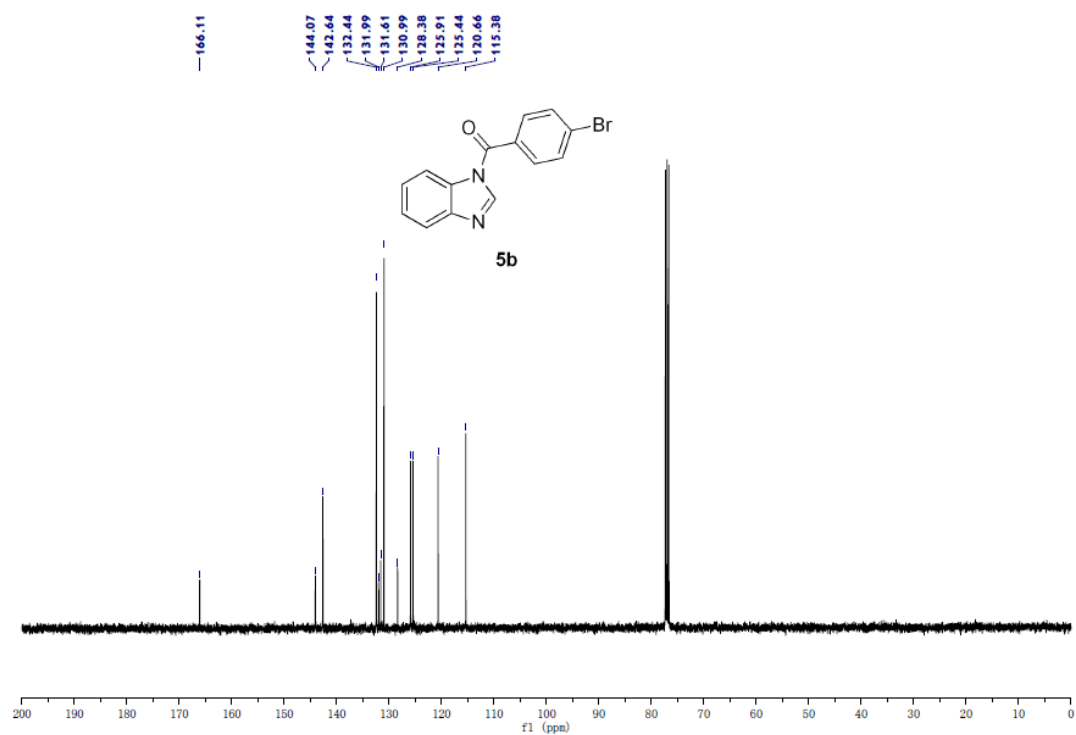

<sup>13</sup>C NMR of product **5b**

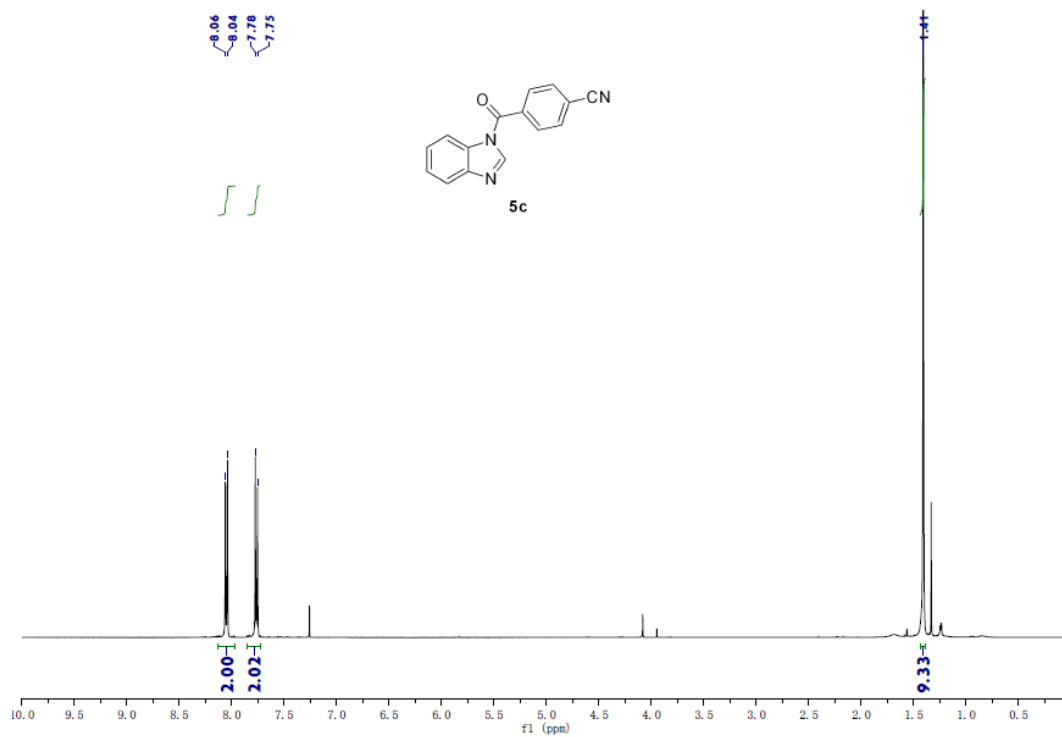

<sup>1</sup>H NMR of product **5c**

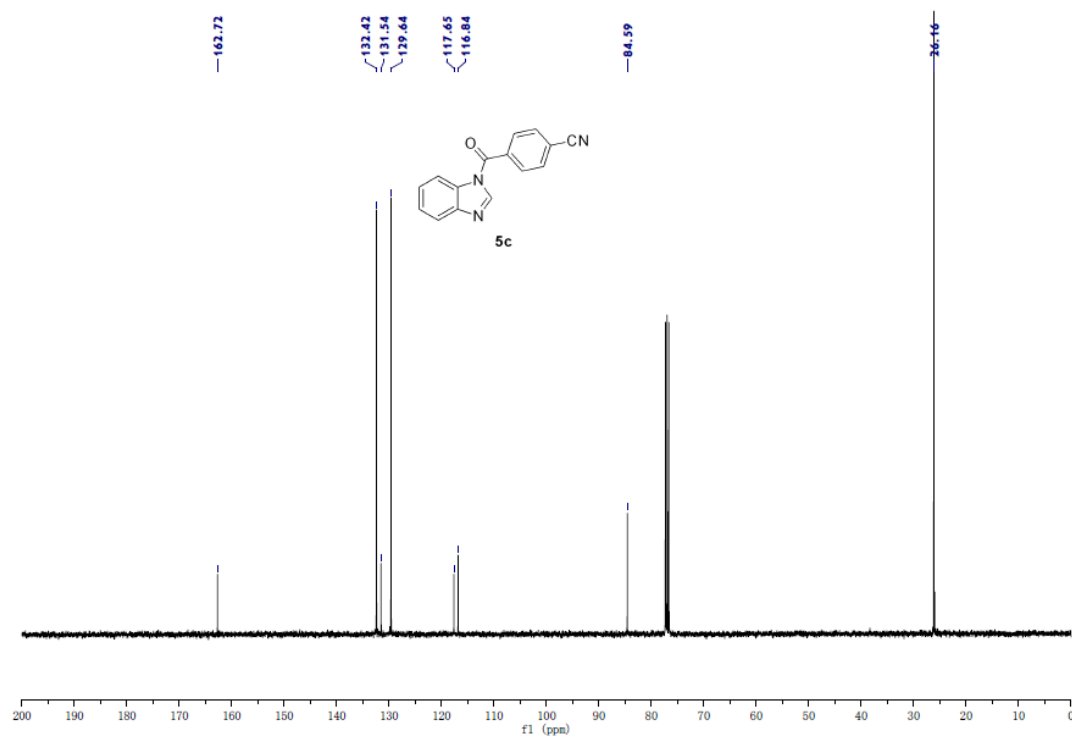

<sup>13</sup>C NMR of product **5c**

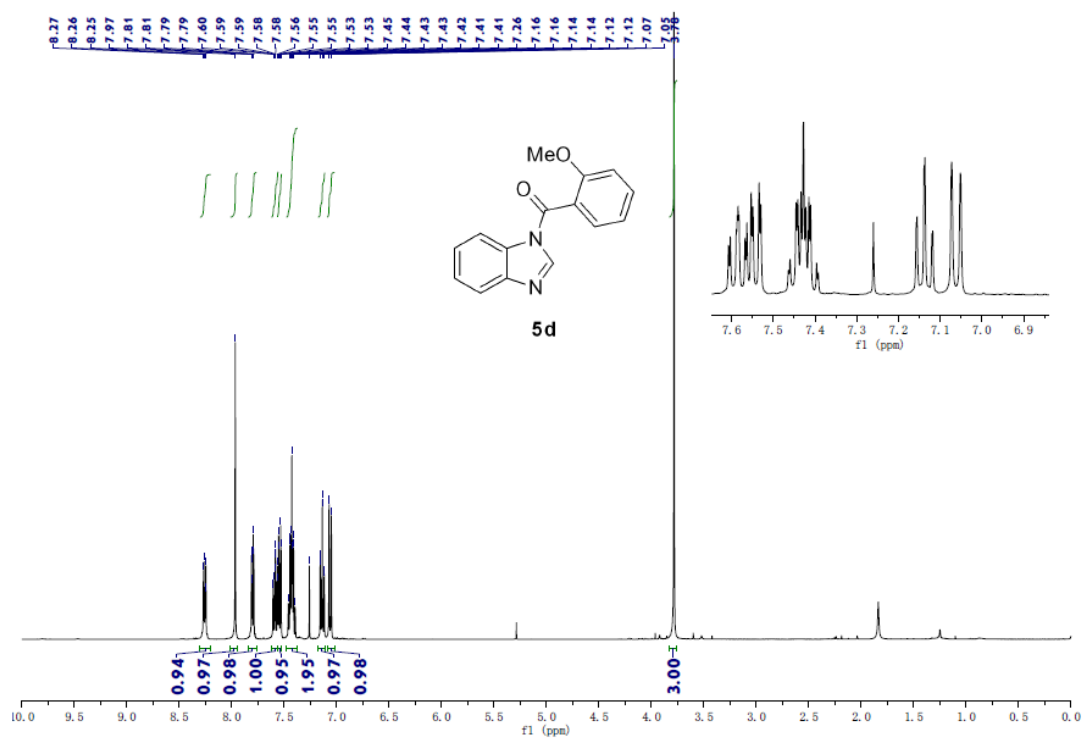

<sup>1</sup>H NMR of product **5d**

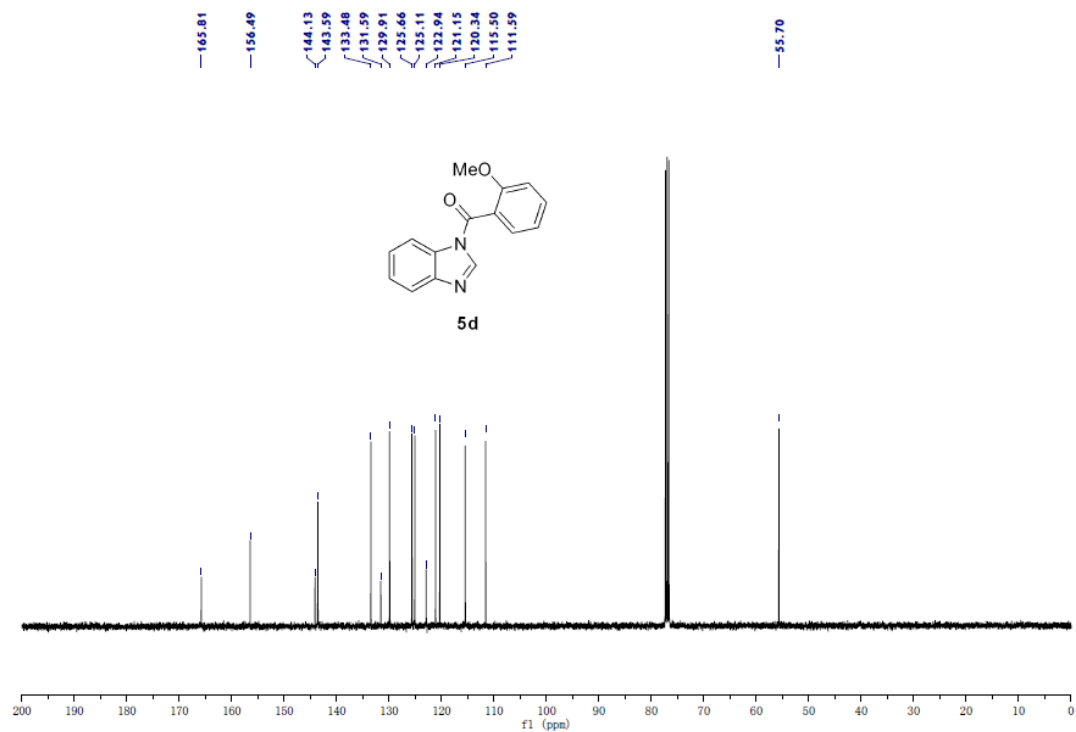

<sup>13</sup>C NMR of product **5d**

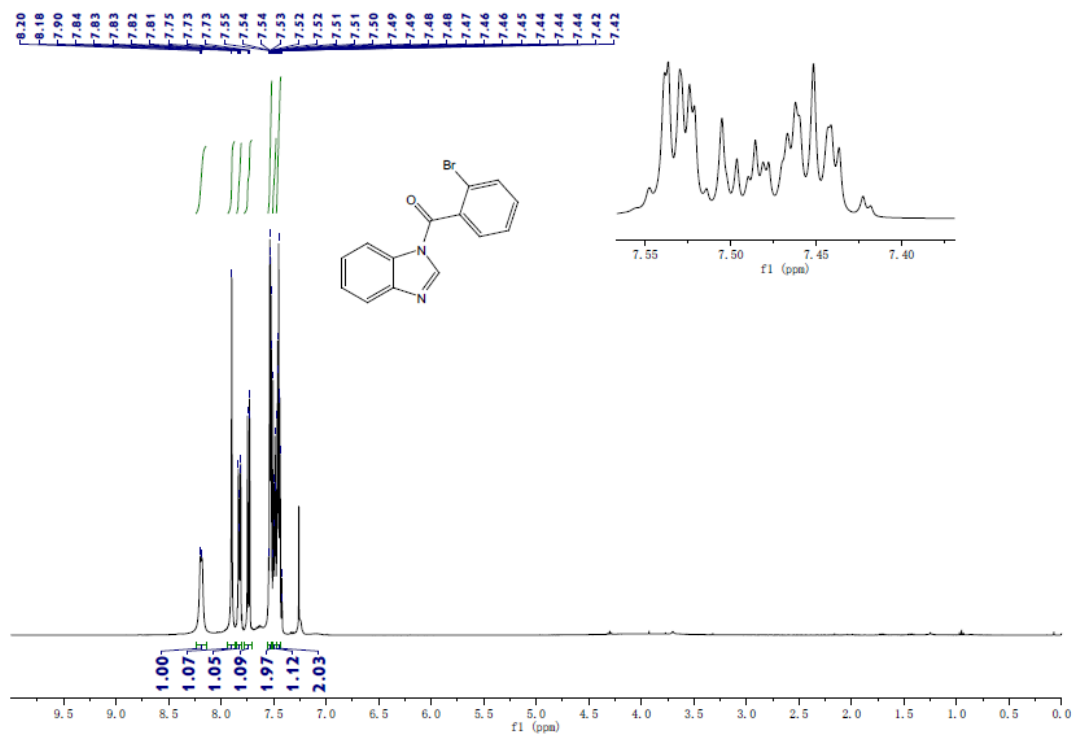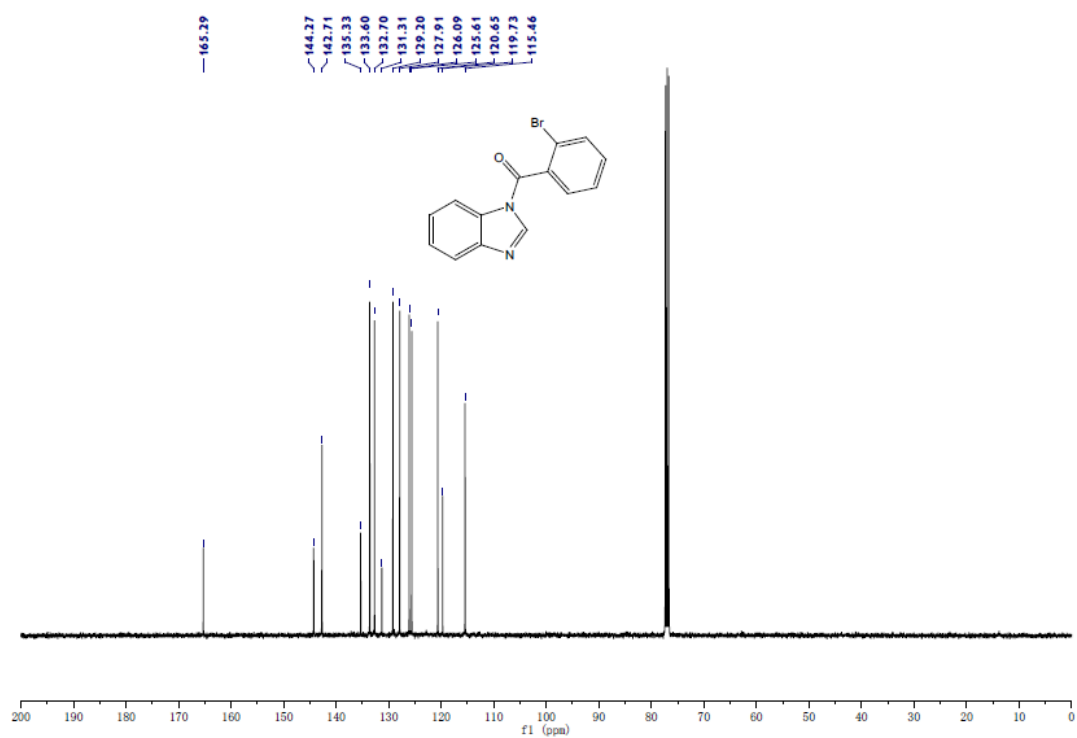

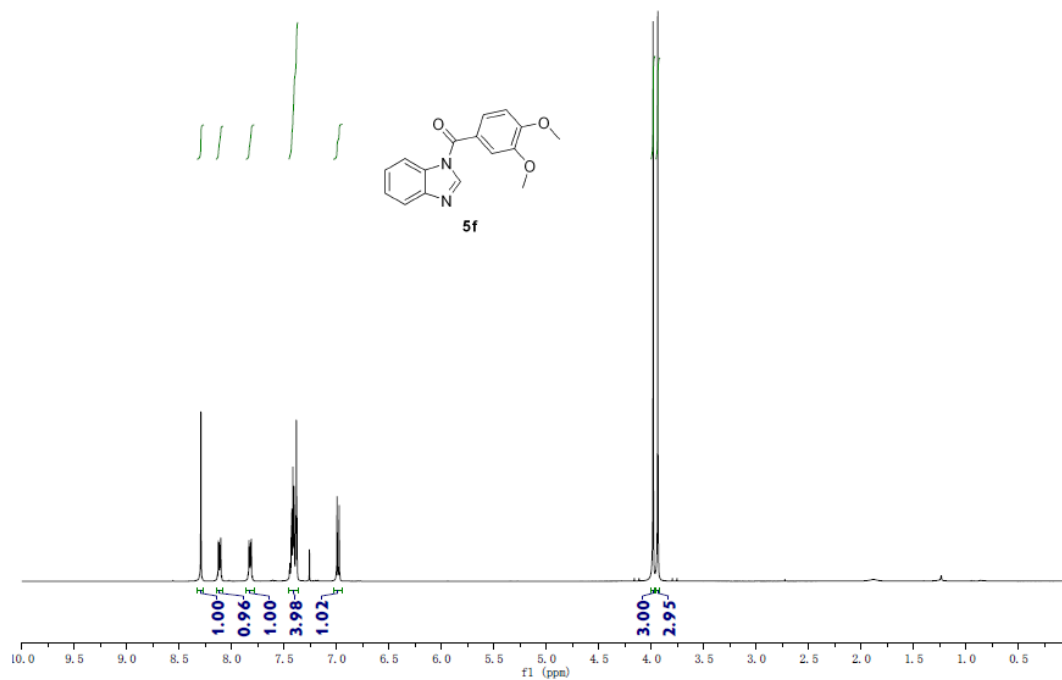

$^1\text{H}$  NMR of product **5f**

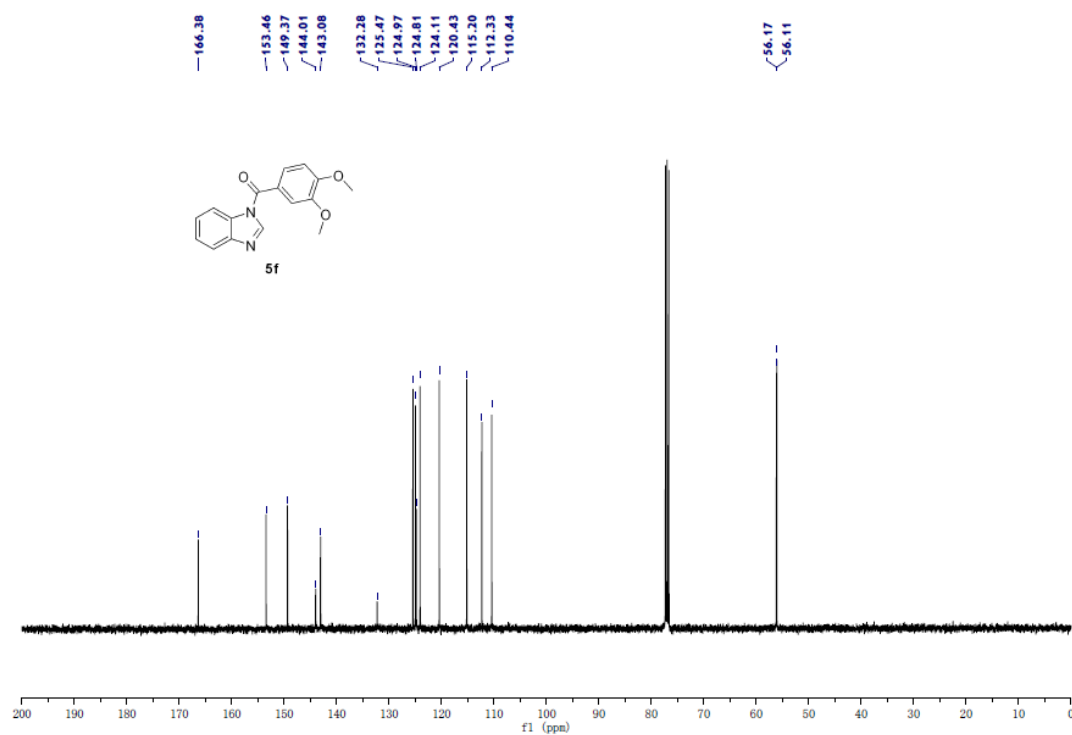

$^{13}\text{C}$  NMR of product **5f**

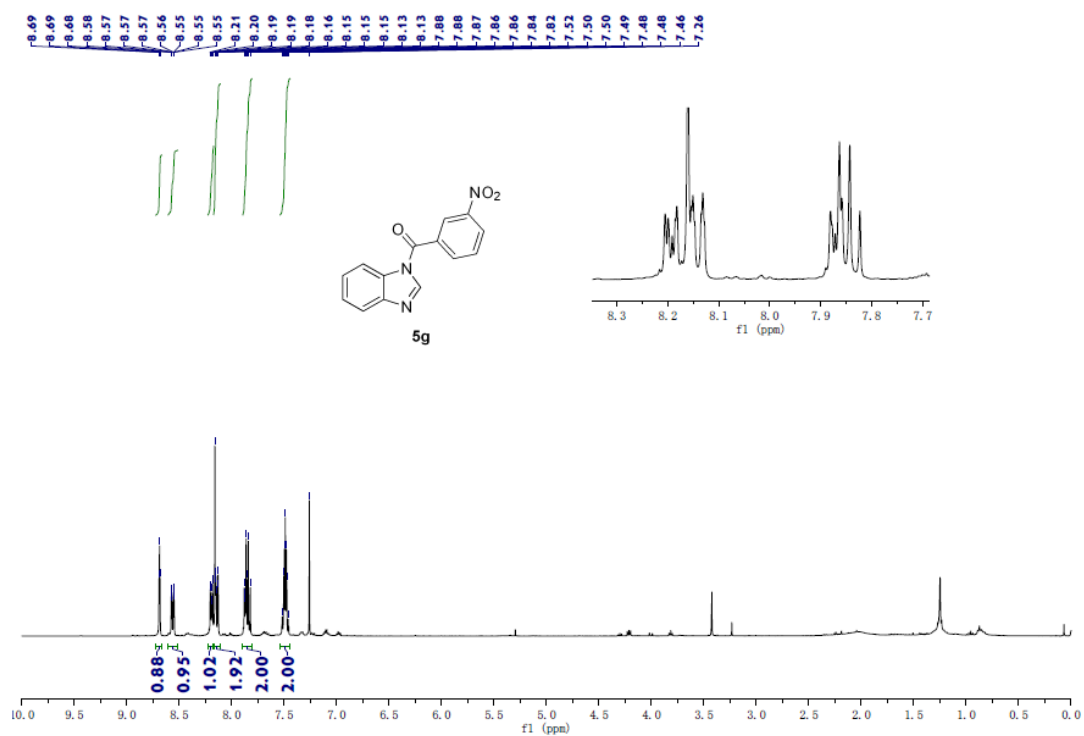

<sup>1</sup>H NMR of product **5g**

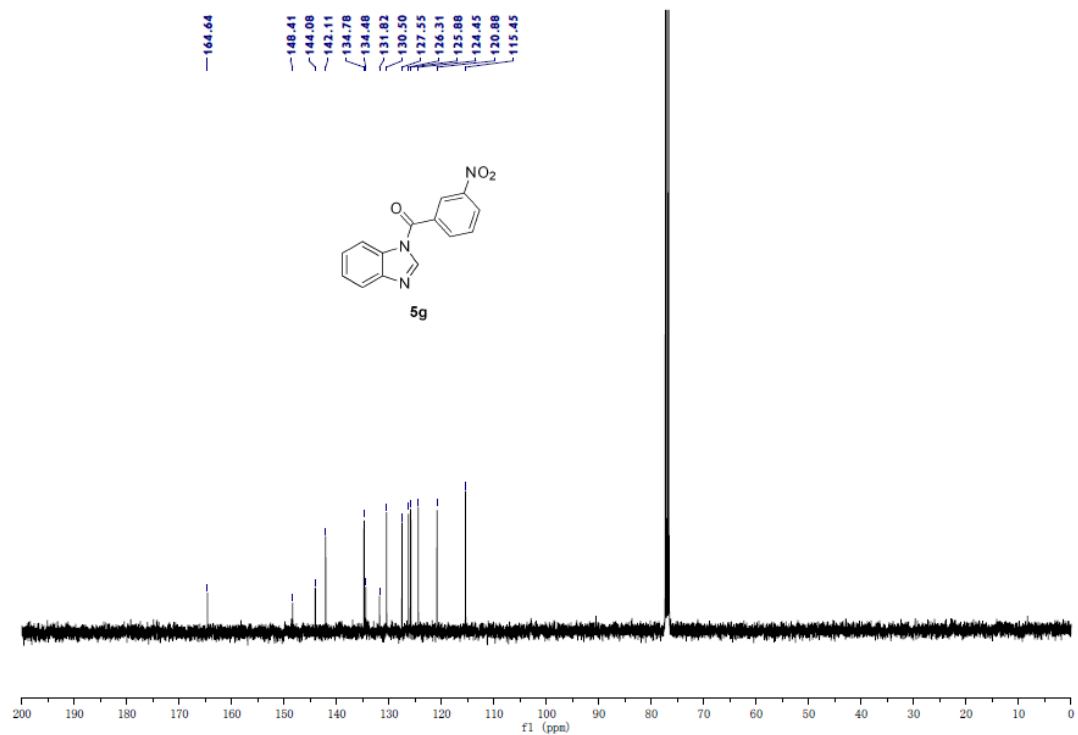

<sup>13</sup>C NMR of product **5g**

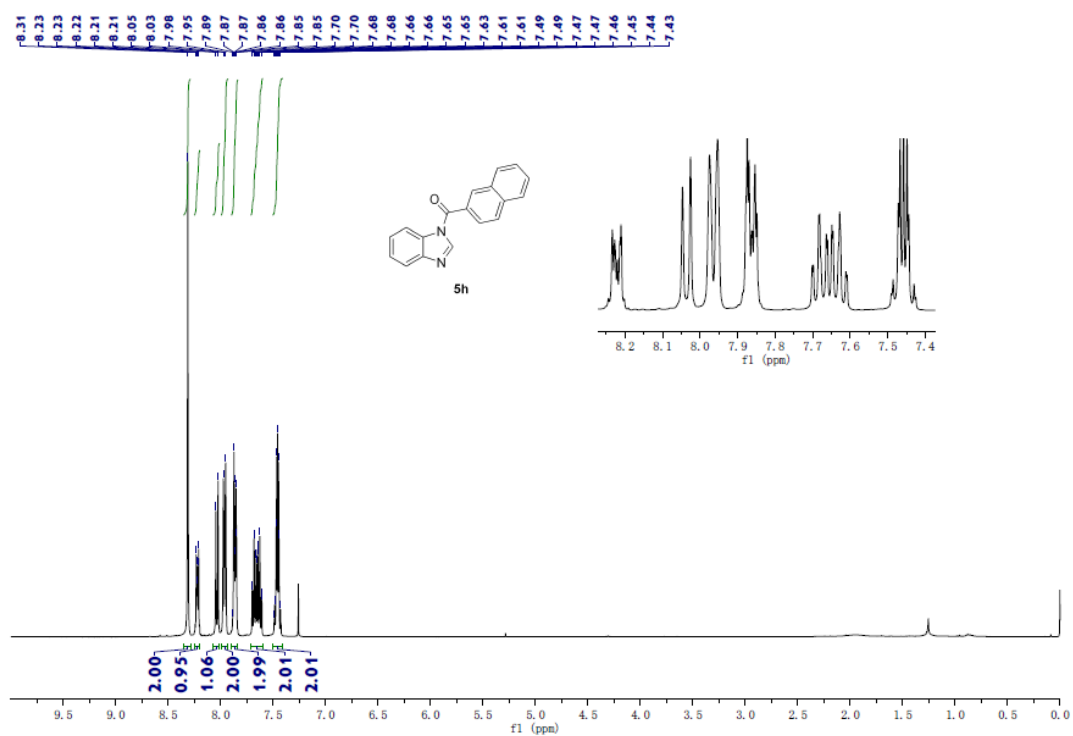

<sup>1</sup>H NMR of product **5h**

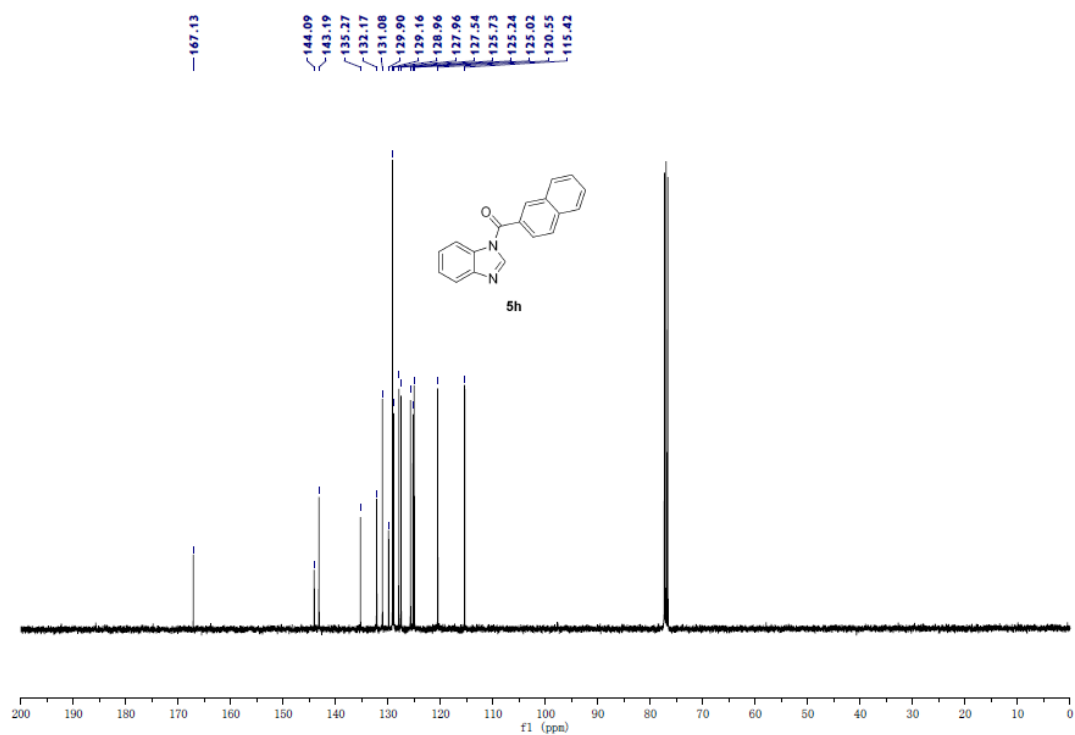

<sup>13</sup>C NMR of product **5h**

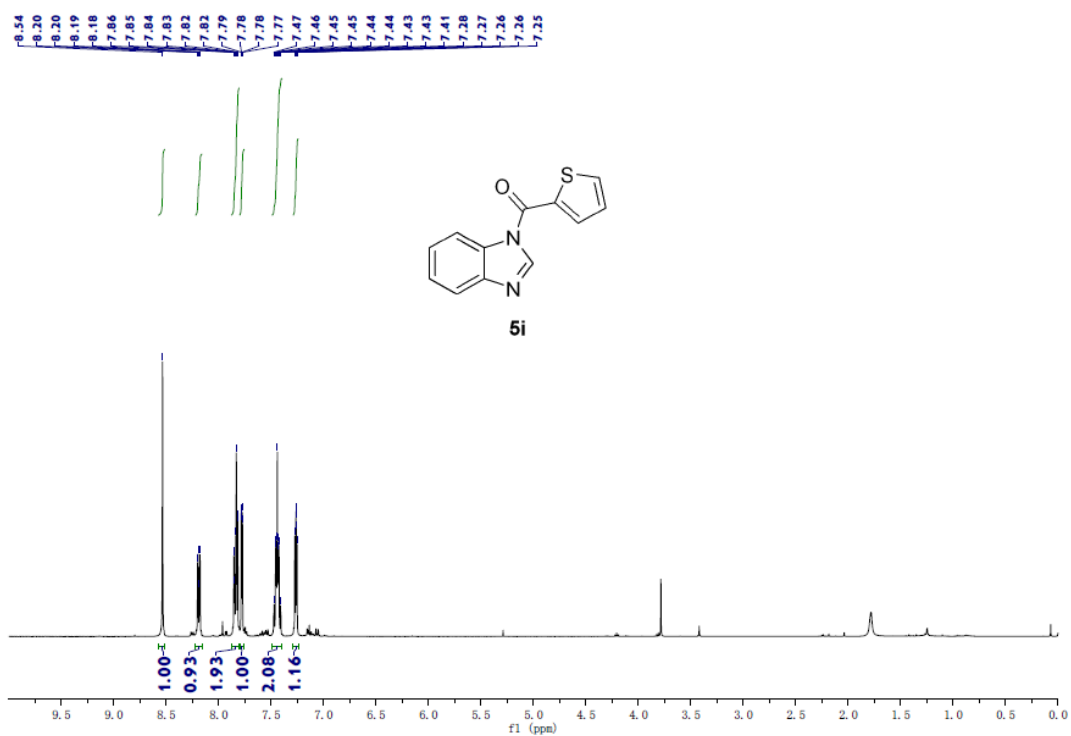

<sup>1</sup>H NMR of product **5i**

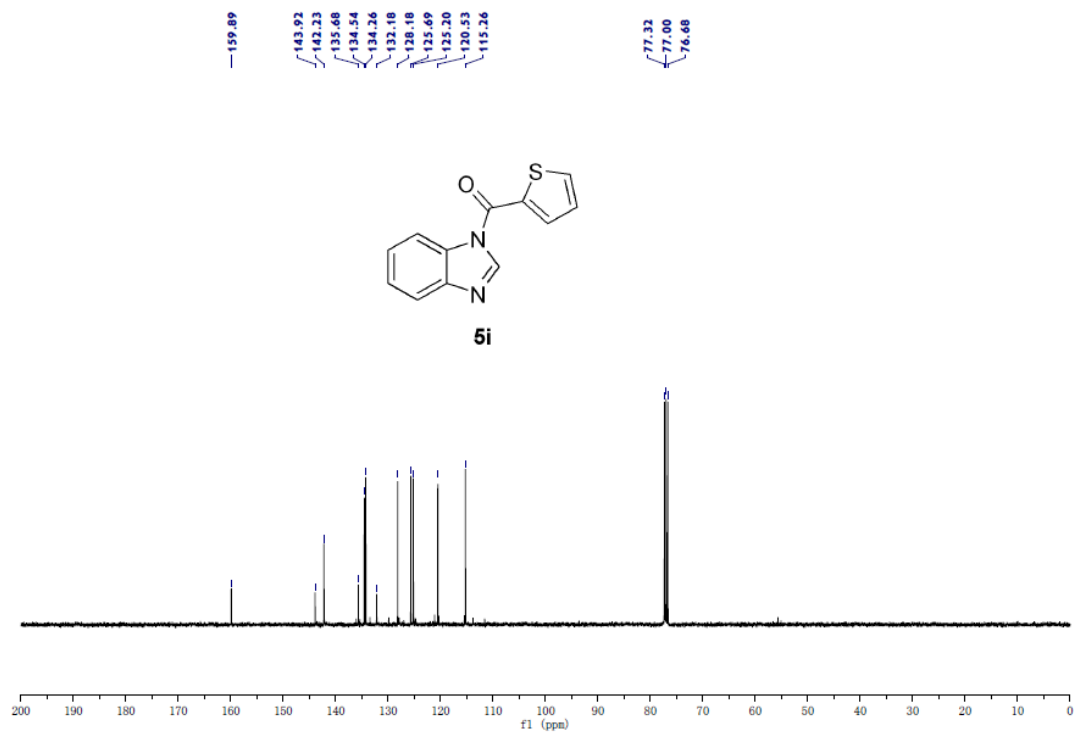

<sup>13</sup>C NMR of product **5i**



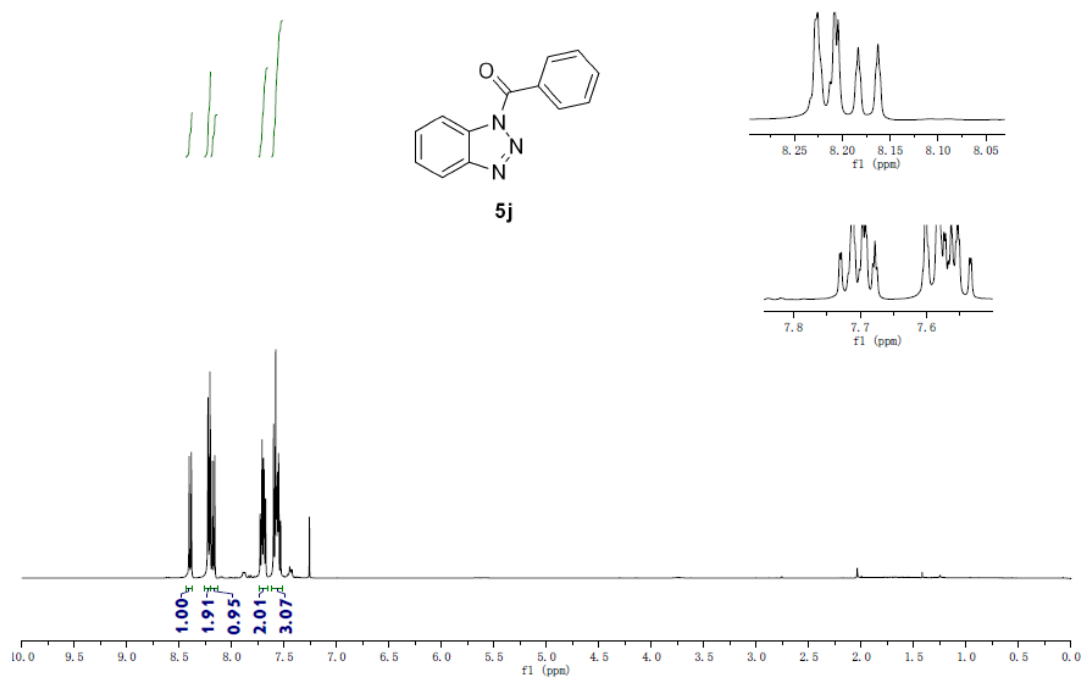

<sup>1</sup>H NMR of product **5j**

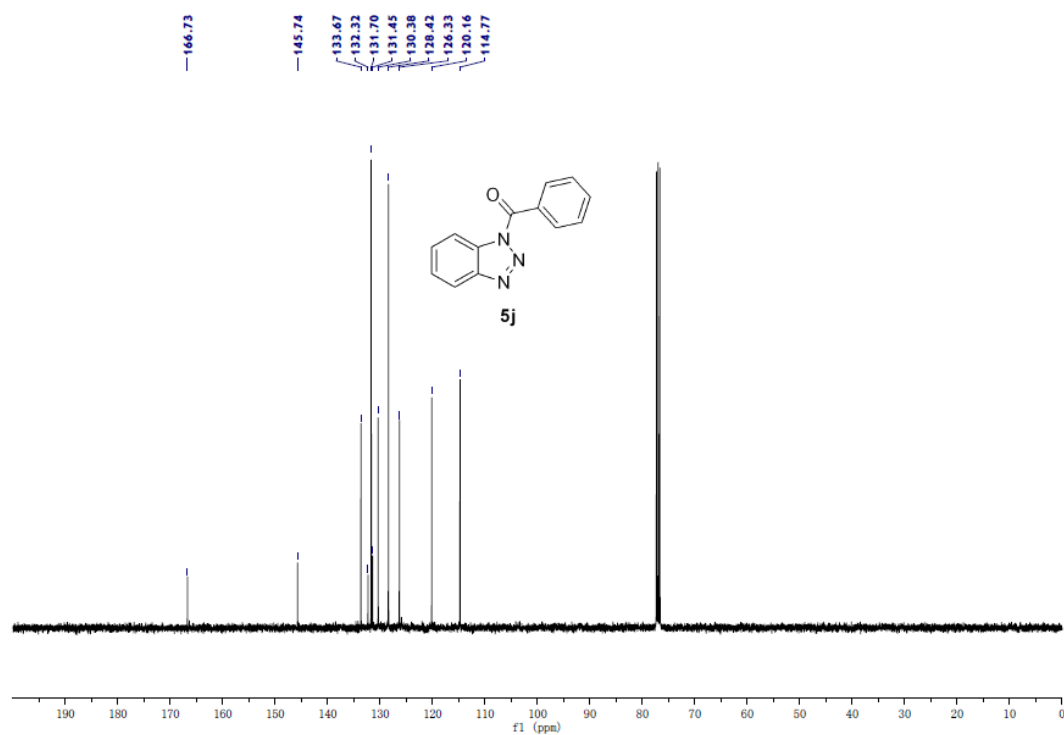

<sup>13</sup>C NMR of product **5j**

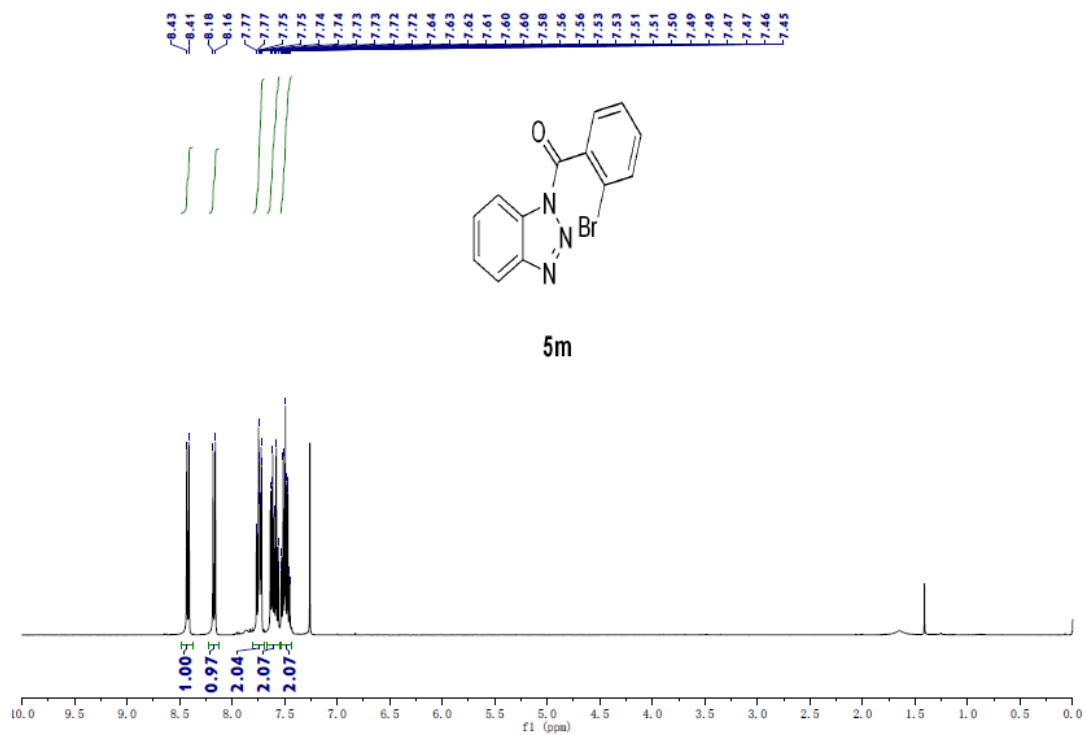

<sup>1</sup>H NMR of product **5m**

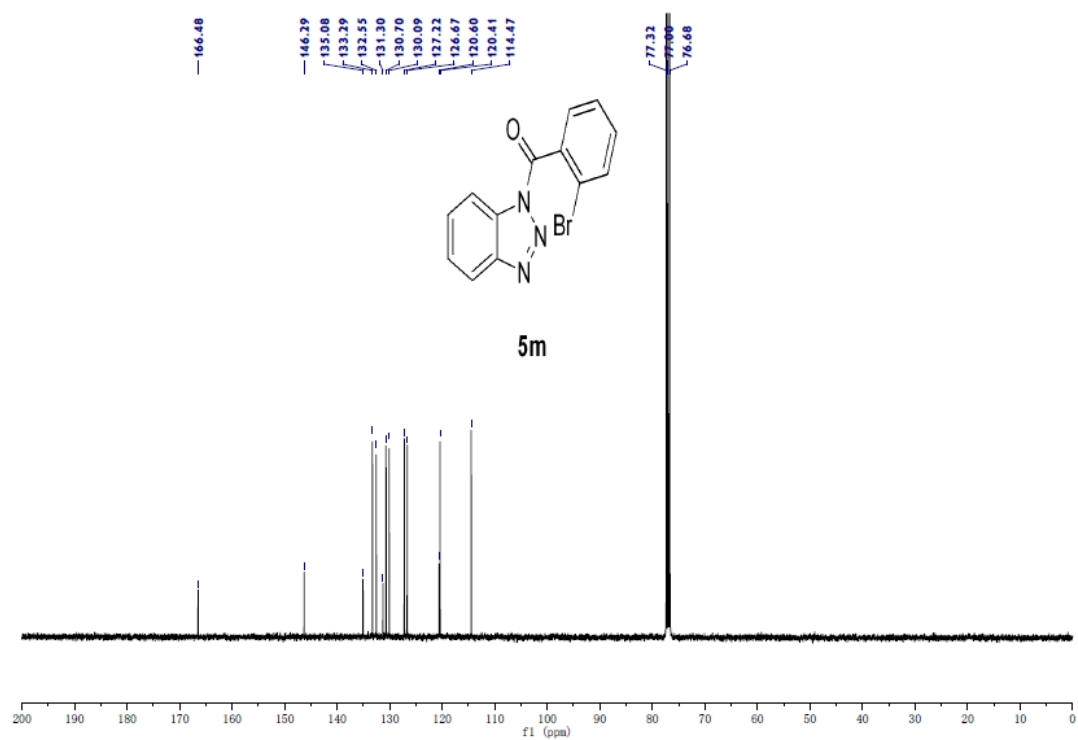

<sup>13</sup>C NMR of product **5m**

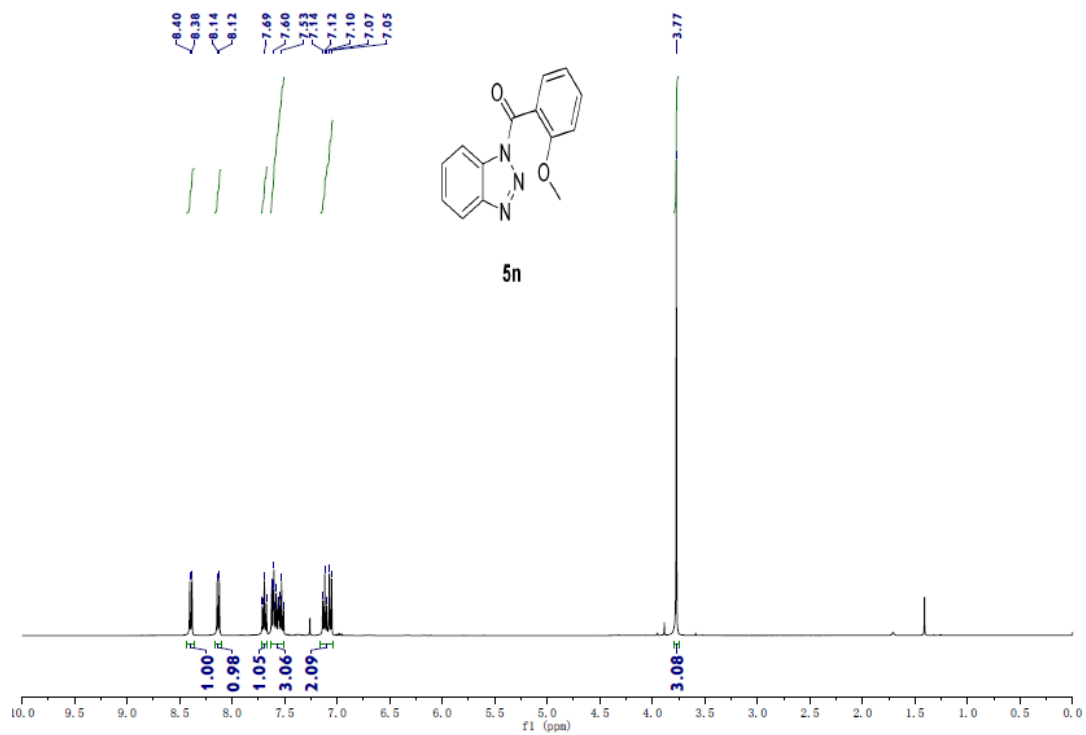

<sup>1</sup>H NMR of product **5n**

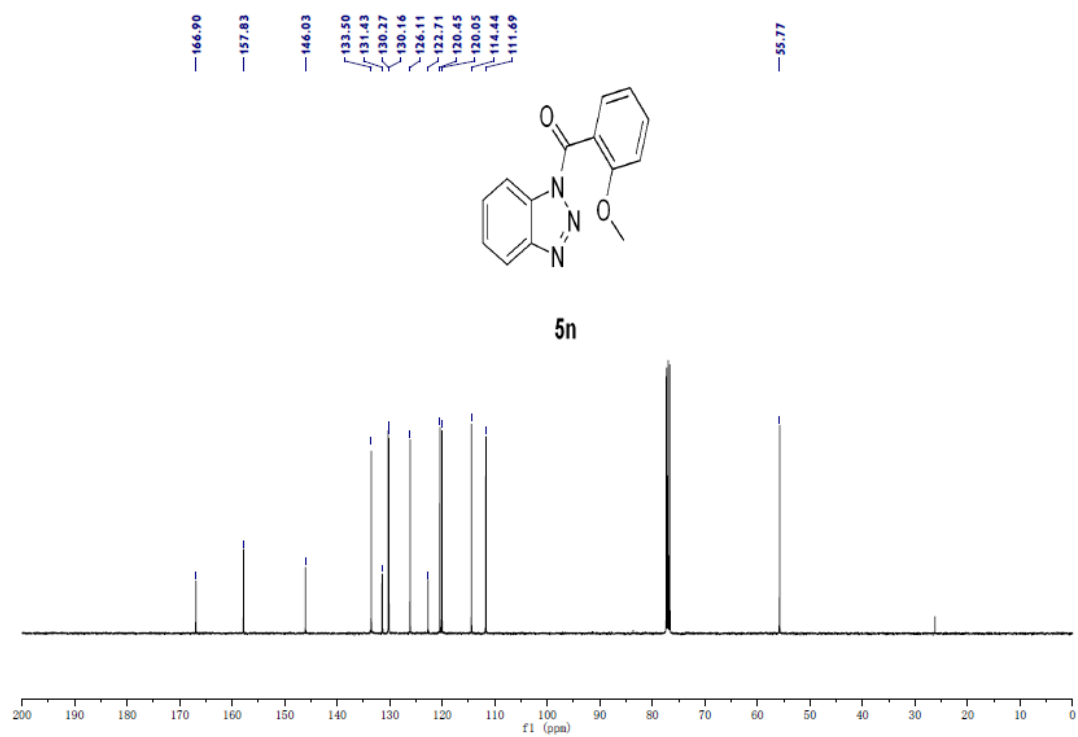

<sup>13</sup>C NMR of product **5n**

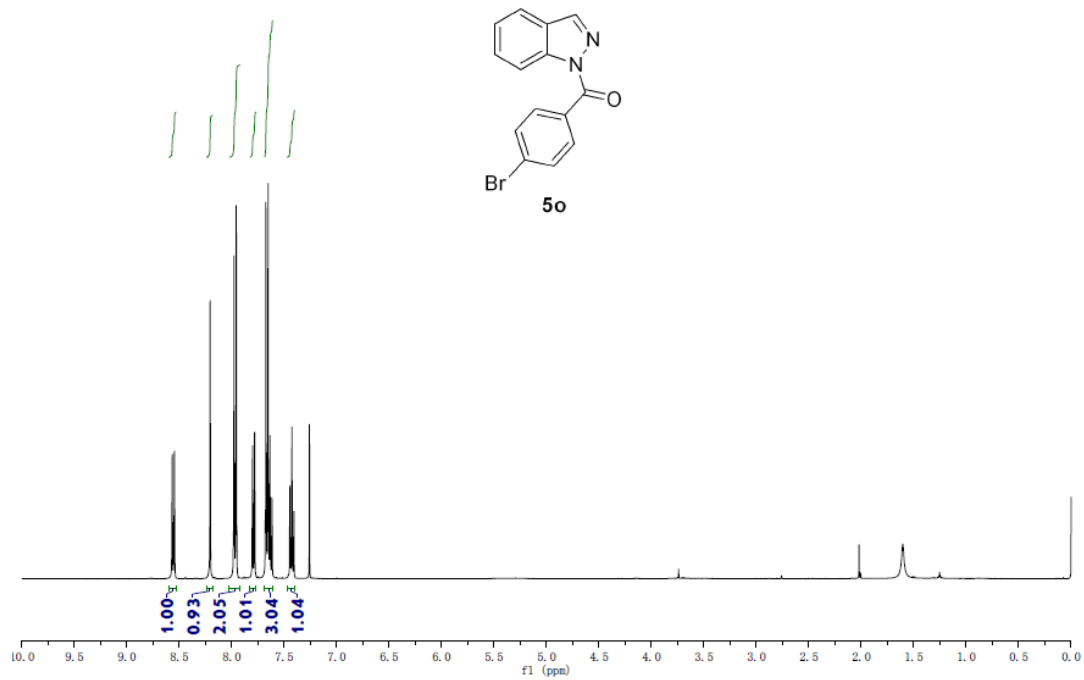

<sup>1</sup>H NMR of product **5o**

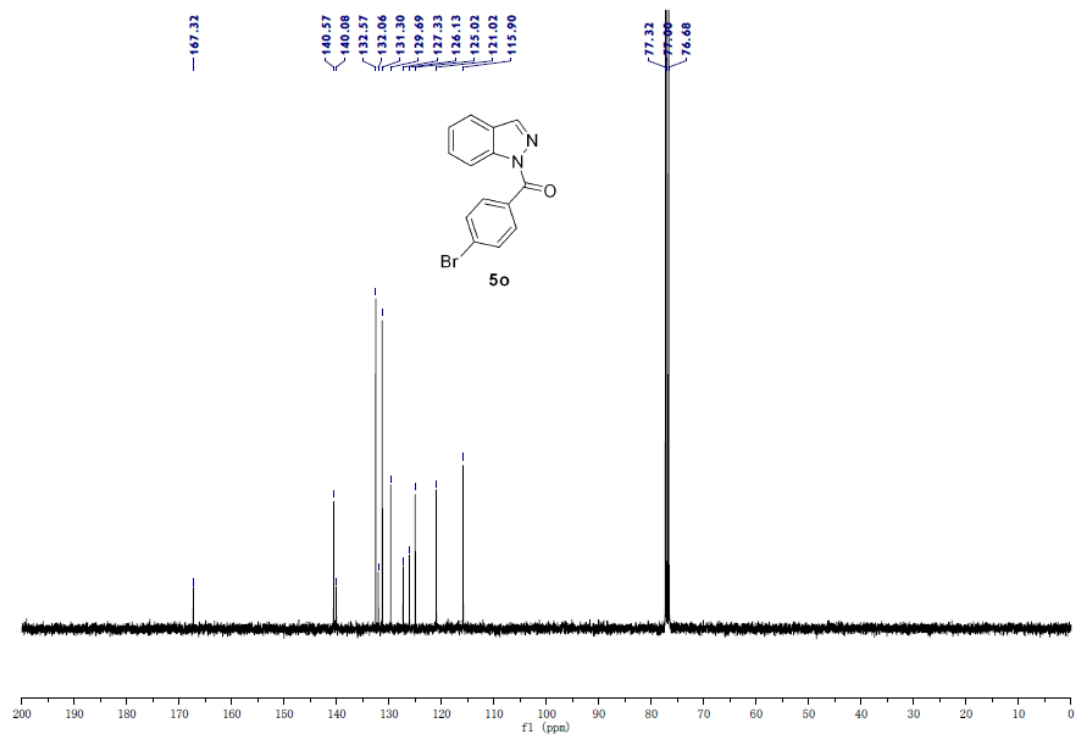

<sup>13</sup>C NMR of product **5o**

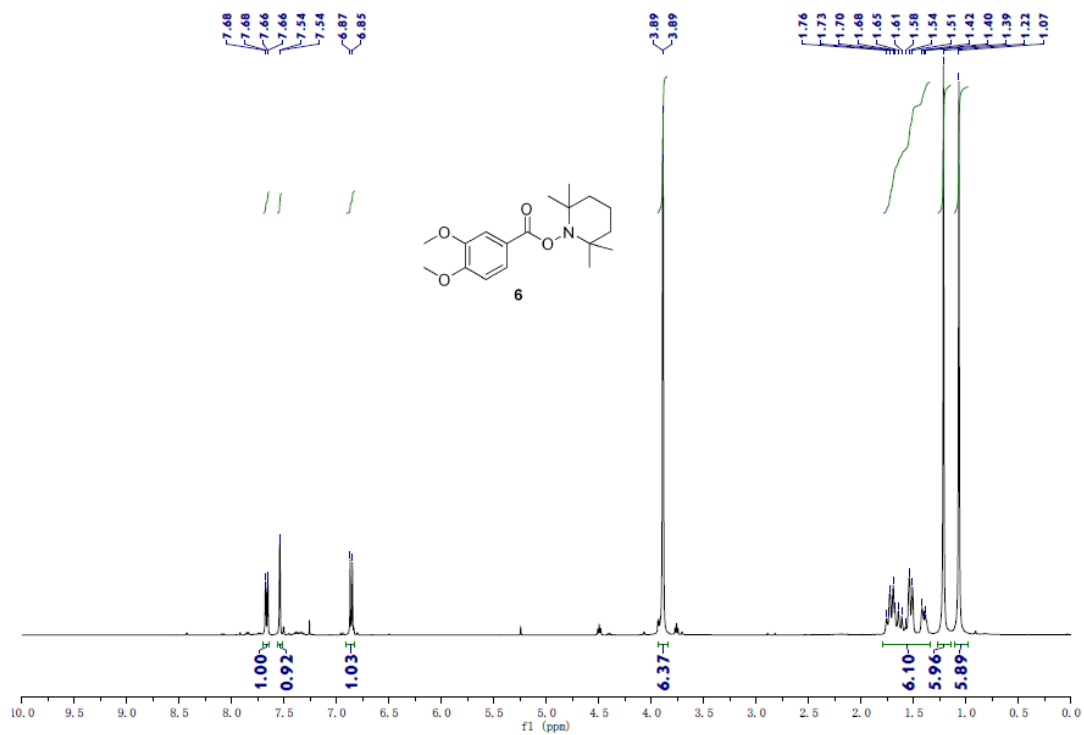

<sup>1</sup>H NMR of product 6

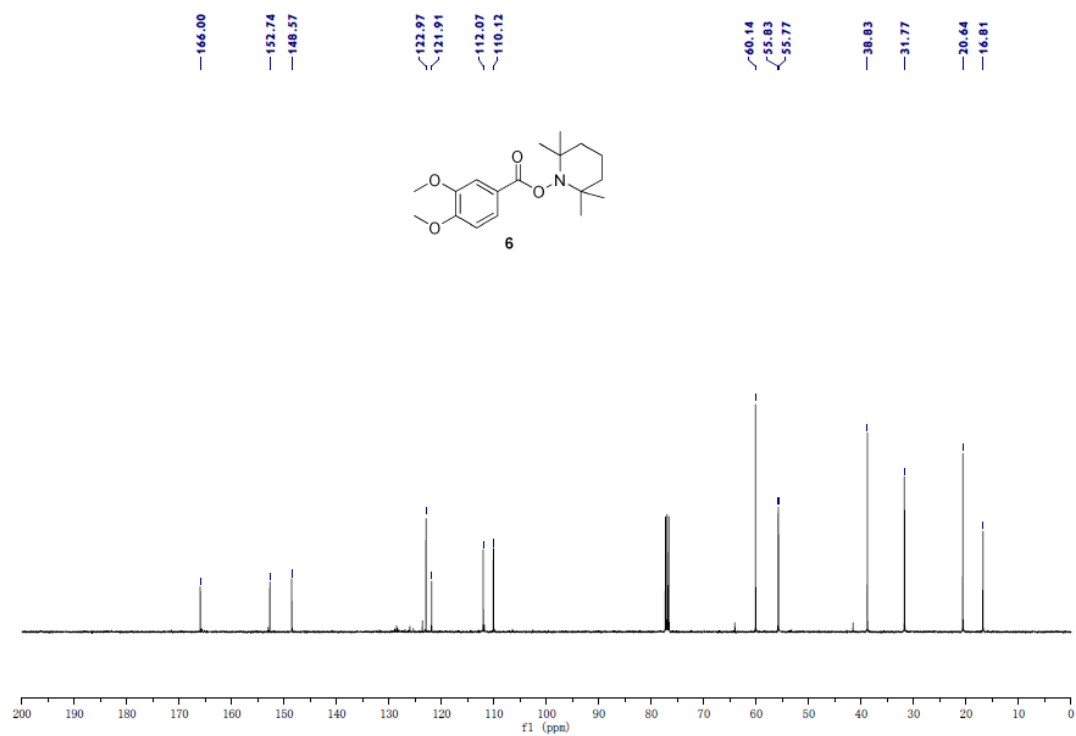

<sup>13</sup>C NMR of product 6
